## **Current Models of Speech Motor Control: A Control-Theoretic Overview of**

### **Architectures & Properties**

Benjamin Parrell <sup>†,1</sup> Adam C. Lammert <sup>†,2, a)</sup> Gregory Ciccarelli,<sup>2</sup> and Thomas F.

Quatieri<sup>2</sup>

<sup>1</sup>*Department of Communication Sciences & Disorders, University of*

*Wisconsin-Madison, Madison, Wisconsin, USA*

<sup>2</sup>*Bioengineering Systems & Technologies, MIT Lincoln Laboratory, Lexington,*

*Massachusetts, USA*

(Dated: 15 January 2019)

1 This paper reviews the current state of several formal models of speech motor con-  
2 trol with particular focus on the low level control of the speech articulators. Fur-  
3 ther development of speech motor control models may be aided by a comparison  
4 of model attributes. The review builds an understanding of existing models from  
5 first principles, before moving into a discussion of several models, showing how each  
6 is constructed out of the same basic domain-general ideas and components – e.g.,  
7 generalized feedforward, feedback, and model predictive components. This approach  
8 allows for direct comparisons to be made in terms of where the models differ, and  
9 their points of agreement. Substantial differences among models can be observed  
10 in their use of feedforward control, process of estimating system state, and method  
11 of incorporating feedback signals into control. However, many commonalities exist  
12 among the models in terms of their reliance on higher-level motor planning, use of  
13 feedback signals, lack of time-variant adaptation, and focus on kinematic aspects of  
14 control and biomechanics. Ongoing research bridging hybrid feedforward/feedback  
15 pathways with forward dynamic control, as well as feedback/internal model-based  
16 state estimation is discussed.

---

a) **Corresponding Author:** [Adam.Lammert@LL.mit.edu](mailto:Adam.Lammert@LL.mit.edu); †Both authors contributed equally to this work.

DISTRIBUTION STATEMENT A. Approved for public release. This material is based upon work supported by the Under Secretary of Defense for Research and Engineering under Air Force Contract No. FA8702-15-D-0001. Any opinions, findings, conclusions or recommendations expressed in this material are those of the author(s) and do not necessarily reflect the views of the Under Secretary of Defense for Research and Engineering.

## 17 I. INTRODUCTION

18 Several formal models of speech motor control have been formulated and presented in the  
19 speech production literature. Based on decades of observation, it seems clear that the mech-  
20 anisms of speech motor control are complex, and consequently benefit from the detailed and  
21 rigorous description that formal, mathematical models can provide. Speech motor control is,  
22 indeed, one of the most intricate sensorimotor activities in which humans engage. Producing  
23 speech requires fine timing and coordination of muscles that are interwoven, redundant and  
24 have complex mechanical properties, in order to move the diverse articulatory structures of  
25 the tongue, lips, jaw, velum and larynx into a wide range of configurations, all of which have  
26 a nonlinear relationship with the vocal tract's acoustic output. Control mechanisms are  
27 additionally modulated by higher-level processes that determine motor planning, and also  
28 mediate semantic, syntactic, prosodic and phonological organization. The various aspects  
29 of speech motor control can be conceptualized as layered modules (see Figure 1). In such a  
30 layered description, the bridge between higher-level planning processes and the movements  
31 of the biomechanical speech-producing structures is a layer which produces motor commands  
32 that drive kinematics given some motor plan and potentially in light of some monitoring or  
33 prediction of action. The central role filled by this layer – hereafter, simply referred to as the  
34 *control layer* – has ensured that all formal models of sensorimotor control for speech have  
35 defined architectures that govern its functionality. The field of models that have provided a  
36 formal description of the control layer comprises: DIVA ([Guenther, 1994; 2016](#)), Task Dy-  
37 namics ([Saltzman and Kelso, 1987; Saltzman and Munhall, 1989](#)), State Feedback Control

38 (Houde and Nagarajan, 2011), ACT (Kröger *et al.*, 2009), GEPPETO (Perrier *et al.*, 2005),  
39 FACTS (Ramanarayanan *et al.*, 2016).

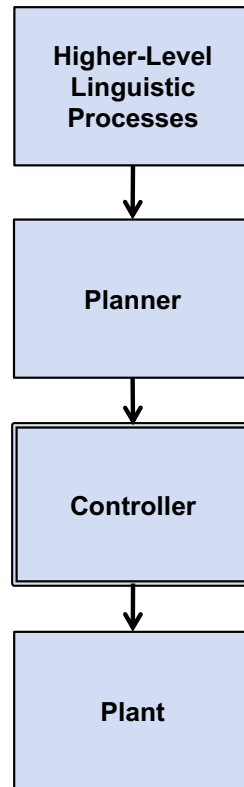

FIG. 1. Representation of the distinct levels of speech production modeling. This paper focuses on modeling the speech controller, the system that takes in a speech plan and potentially feedback from the plant and issues motor commands to the plant. Other components of the speech production hierarchy include higher level linguistic processes (prosody, semantics, syntax), the planner (low level sequencing of motor actions), and the plant itself (e.g. speech synthesizers including but not limited to articulatory synthesizers such as CASY, Birkholz or Maeda).

40 An impediment to progress in developing rigorous speech motor control models appears  
41 to be the variety of distinct approaches, taken in the published literature, to explaining  
42 the attributes of the more prominent models of speech motor control. There is very lit-

43 tle agreement, for instance, even concerning the terminology used to describe the models.  
44 Nevertheless, there is reason to believe that a direct comparison of speech control models  
45 is possible, based on the important, high-level observation that the models presented in  
46 the literature are all closely related to engineering approaches to motor control, and bear  
47 a strong resemblance to classical control-theoretic architectures. Given that the theory be-  
48 hind current understanding of biological motor control largely grew out of early advances in  
49 engineering fields ([Bellman, 1957](#); [Wiener, 1948](#)), it is perhaps unsurprising that the same is  
50 true specifically in the area of speech motor control. Indeed, engineering approaches are a  
51 sensible place to begin investigations into the nature of speech motor control, in part because  
52 our current understanding of the functional interpretation of motor control neuroanatomy  
53 follows the engineering architectures closely (consider, e.g., [Brainard and Doupe \(2002\)](#);  
54 [Shadmehr and Krakauer \(2008\)](#); [Takakusaki \(2017\)](#); [Wolpert \*et al.\* \(1998\)](#)).

55 Progress in the development of speech motor control models may be facilitated by a direct  
56 comparison of the various models, using a common framework of domain-general (i.e., not  
57 speech-specific) motor control principles and unified terminology to describe their attributes.  
58 The purpose of the present paper is to provide such a direct comparison for models of the  
59 control layer that utilize mechanisms to move the plant in support of accomplishing speech  
60 tasks in accordance with higher-level speech goals. These models have been developed  
61 to attempt meaningful reproduction of speech behavior, including potentially acoustics,  
62 articulatory and neural signals. Demonstrations of the ability of these models to capture  
63 aspects of human speech production kinematics have been presented in the literature, and  
64 the extent and quality of these efforts may differ by model. No systematic review will be

65 offered here of experimental data, either behavioral or neurological, that has been or could  
66 be used to support the expressivity or biological plausibility of any model. However, a brief  
67 summary of the demonstrated capabilities of each model is included. This choice reflects an  
68 intention to focus on the model architectures themselves.

69 Our review begins with general motor control principles and approaches, before moving  
70 into basic, domain-general models of motor control. The paper then proceeds to provide  
71 detailed discussions of currently proposed models of speech motor control, showing how  
72 each model is constructed out of these basic domain-general ideas and components. By  
73 showing how each model is built up on these basic elements, this approach allows for a clear  
74 comparison between the proposed models, showing where they differ as well as points of  
75 agreement. The present review focuses specifically on control of the speech articulators in  
76 fully developed, adult speech. Control that is adaptive (i.e., time variant), which may be  
77 relevant for speech acquisition and development, will only be considered in the discussion,  
78 and not in the primary overview framework. Formal explanations, including an appendix  
79 with full equations for each model, is provided where possible. Other important aspects of  
80 speech production, including learning and optimization, higher-level linguistic processing,  
81 motor program generation (i.e. the “planner”), the neurological basis of hypothesized model  
82 components, and biomechanical details of the speech articulators (i.e. the “plant”) will only  
83 be discussed to the extent necessary to clarify the nature and operation of the proposed  
84 control mechanisms.

## 85 II. BACKGROUND

### 86 A. Motor control principles and terminology

87 The first step in discussing speech motor control models is to define certain key concepts  
88 and terminology. To illustrate these ideas, a simple example is borrowed from the control  
89 of upper extremity reaching control, as shown in Figure 2, which is based on the descrip-  
90 tion of a simple two-link robotic arm moving on a planar surface. This commonly-used  
91 example, though taken from a completely different domain of motor control, shares many  
92 of the same concepts and terminology with speech motor control, and has the benefit of  
93 being low-dimensional, which makes it possible to represent the relevant spaces in a two-  
94 dimensional plot. Fundamental similarities and distinctions between this simple example  
95 and the (considerably more complex) speech production system, in terms of their assump-  
96 tions and structure, will be drawn where appropriate throughout the present section.

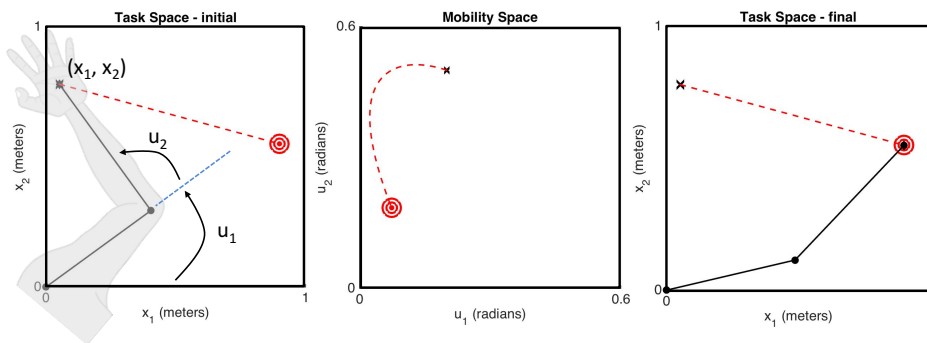

(left panel) Robot arm in its initial configuration at  $(x_1, x_2)$  in task space, and the final goal (red circle). The arm's state variables  $(u_1, u_2)$  are defined as the angles of the shoulder and elbow.  $(u_1, u_2)$  are the parameters directly changed by the controller and therefore exist in mobility space. (middle panel) The trajectory in mobility space. The evolution of the mobility space variables  $(u_1, u_2)$  over time may be a non-linear trajectory despite a linear trajectory in task space. (right panel) The final orientation of the arm in task space at the goal.

FIG. 2.

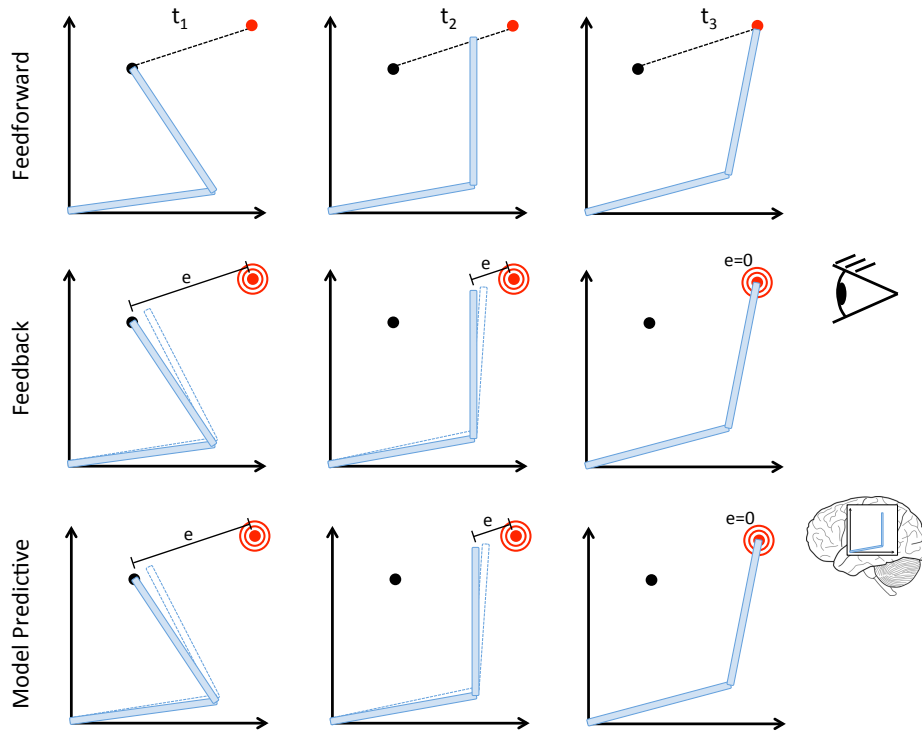

Illustration of the difference between feedforward (top row), feedback (middle row) and model predictive (bottom row) control using a simple reaching example. In feedforward control, the arm traces out a fully preplanned trajectory with no feedback about the position of the arm at any point in time. In feedback control, an error is computed between an observed state of the system (observation represented by the eye) and the target. The arm progressively works to minimize this error which drives the end effector towards the target. In model predictive control, an error is computed internally as opposed to being derived from feedback of the state of the system (represented by the brain with an internal model of the robot arm). The arm's position is updated to minimize the predicted error of the system.

FIG. 3.

97 The robotic arm, as a physical structure, is the apparatus to be controlled, and can  
 98 be referred to as the plant ( $G$ ). Note that the term *plant* is not specific to this example,  
 99 and could be used in the domain of speech production to specify the vocal tract and its  
 100 component articulators, as well as possibly the larynx and the respiratory system. The  
 101 plant's two links are connected to each other at a revolute joint that changes the angle  
 102 between the links,  $u_2$ . The proximal end of the robot's first link is fixed at the origin of



103 the planar surface, defined as  $(x_1, x_2) = (0, 0)$ , but is free to rotate about this point which  
104 changes the angle  $u_1$ . These two variables,  $u_1$  and  $u_2$  describe the configuration of the plant,  
105 and also define the set of possible configurations of the plant, known as *mobility space*<sup>1</sup>. The  
106 variables  $u_1$  and  $u_2$  can be considered as elements of a single  $1 - by - 2$  vector,  $\mathbf{u}$ , which can  
107 be said to specify the state of the plant in mobility space (sometimes, the *mobility state*).

108 The distal end of the second link (i.e., the “hand”) is considered the end-effector of the  
109 robot, the precise positioning of which is typically the focus of controlling the plant in the  
110 context of reaching tasks. The variables  $x_1$  and  $x_2$ , already used to define locations on the  
111 planar surface, can also be used to describe the location of the end-effector on that surface.  
112 The space of possible locations for the end-effector is known as *task space*, and the desired  
113 outcome of a controlled movement is known as a *task*. The variables  $x_1$  and  $x_2$  can be  
114 considered as elements of a single  $1 - by - 2$  vector,  $\mathbf{x}$ , specifying the state of the plant  
115 in task space (sometimes, the *task state*). Tasks with respect to the robotic arm might be  
116 putting the end-effector as a specified location in task space (i.e., achieving a state where  
117  $\mathbf{x}$  takes on a particular value), or alternatively achieving a specific trajectory through task  
118 space (i.e., tracking some sequence of values for  $\mathbf{x}$ ). In speech production, task spaces might  
119 include, for instance, formant space or vocal tract constriction degree/location space.

120 Task and mobility spaces can be viewed as “high” and “low” level spaces, respectively,  
121 with the variables comprising each space having a hierarchical arrangement where the task  
122 variables are composed of, but distinct from, mobility variables. Often this arrangement is  
123 many-to-one, such that many different (or, potentially infinite) locations in mobility space  
124 will map to the same location in task space. Task variables consequently describe the state

125 of the plant in a way that is directly relevant to the task, and which abstracts away from  
126 a certain amount of detail as to how that task state was achieved via some mobility state.  
127 Mobility variables describe the state of the plant in a way that is more relevant to control, in  
128 the sense that motor commands are typically defined so as to affect some change in mobility  
129 state. Using the robotic arm example, motor commands would typically be given in terms  
130 of the joint angles, and not in terms of the end-effector position. In a speech context, a  
131 model might assert that motor commands are issued in terms of the positions of the speech  
132 articulators (e.g. upper lip, lower lip, tongue tip, etc.), and not in terms of some desired  
133 formant values (e.g.,  $F1 = 500$  Hz) or vocal tract constrictions (e.g., lip aperture = 2 mm).

134 The details of the task are specified in the *reference*,  $\mathbf{r}$ , a vector representing a desired  
135 state. The reference vector typically resides in task space ( $\mathbf{r}_x$ ), but may also be given in  
136 mobility space ( $\mathbf{r}_u$ ) for specific applications. Reference vectors originate in the planner ( $P$ ),  
137 and may be part of a larger motor program maintained by the planner, toward achieving  
138 some higher-level sensorimotor or cognitive goal (e.g. reach to a series of targets in space,  
139 utter the word “dad”). As implied above, however, reference vectors will typically be insuf-  
140 ficient for use directly as motor commands to the plant because they reside in task space.  
141 The reference will need to be transformed into a motor command in mobility space. This is  
142 the function of the controller.

143 The controller ( $C$ ) is the bridge between the planner and any feedback, on the one  
144 hand, and movements of the plant, on the other. The ultimate purpose of the controller  
145 is to issue motor commands that produce movement (or lack thereof) in the plant. Note  
146 that the present paper assumes that motor commands take the form of vectors in mobility

147 space,  $\mathbf{u}$ , and that those vectors can be used directly as commands to the plant. In a real  
148 biological system, several transformations may be required for encoding motor commands  
149 as neural signals, and to elicit muscle activations that bring about changes in mobility state.  
150 This assumption is made to promote consistency with the speech motor control modeling  
151 literature, and for the sake of simplicity. In any case, the motor command issued by the  
152 controller will depend either upon the reference directly, or upon the *state error*,  $\mathbf{e}$ , a vector  
153 representing the difference between the reference and the plant's state (or an estimate of  
154 that state, see below).

155 In biological systems, the plant's actual state may not always be directly accessible to the  
156 controller. It can be therefore important to develop the notion of a *state estimate* ( $\hat{\mathbf{x}}$  or  $\hat{\mathbf{u}}$ ),  
157 which is an internal estimate of the plant's state, either in task space or in mobility space.  
158 The state estimate may be informed by sensory measurements of the plant's actual state –  
159 represented by the *sensory state* vector  $\mathbf{y}$  – and by predictions generated from an internal  
160 model of the plant – represented by the *predicted state* vector  $\tilde{\mathbf{x}}$  or  $\tilde{\mathbf{u}}$ . The sensory state  
161 vector, an approximation to either  $\mathbf{x}$  or  $\mathbf{u}$ , may be corrupted by some combination of noise  
162 (e.g., neuronal noise), delays (e.g., slowed synaptic/axonal propagation) or transformations  
163 (e.g., warping). The predicted state vector may also be imperfect, since the internal model  
164 may be inaccurate or biased. For the robotic arm example, the sensory state vector would  
165 represent measured joint angles ( $\mathbf{y}_{\mathbf{u}}$ ). This contrasts with the sensory output for speech  
166 production, which is typically considered to be a combination of auditory ( $\mathbf{y}_{aud}$ ) and so-  
167 matosensory signals ( $\mathbf{y}_{somat}$ ), where the somatosensory signal may include proprioceptive  
168 and/or tactile sensation.

169 In general, motor control can be viewed as a collection of transformations between vectors  
170 and spaces of different types, and the planner, the controller, and the plant can all be  
171 described – using the conventions developed above – as functional transformations from  
172 specific inputs to specific outputs. The planner generates the reference vector,  $\mathbf{r} = P(\alpha)$  as a  
173 function of some high-level motor program-related information  $\alpha$ , and possibly as a function  
174 of time:  $\mathbf{r} = P(\alpha, t)$ . The controller takes a reference vector or an error vector as input  
175 and generates a motor command in mobility space:  $(\mathbf{u}, \dot{\mathbf{u}}) = C(\mathbf{r})$  or  $(\mathbf{u}, \dot{\mathbf{u}}) = C(\mathbf{e})$ . The  
176 plant, which can also be viewed as a transformation, converts motor commands, through  
177 movement, into different plant states which can be measured in both mobility and task  
178 space:  $(\mathbf{u}, \dot{\mathbf{u}}, \mathbf{x}, \dot{\mathbf{x}}) = G(\mathbf{u}, \dot{\mathbf{u}})$ . These variables are used in Figure 4, and in related diagrams  
179 throughout the paper. The state of the plant can then be measured by some sensory system:  
180  $(\mathbf{y}, \dot{\mathbf{y}}) = S(\mathbf{u}, \dot{\mathbf{u}}, \mathbf{x}, \dot{\mathbf{x}})$ , the details of which are often not explicitly treated in the literature.  
181 Therefore, the present review will often lump  $G$  and  $S$  together into a single component.

## 182 B. Types of motor control models

183 The purpose of this section is to lay out, in a general way, some common control architec-  
184 tures that are employed in various control applications, including both controlling robotic  
185 systems as well as describing the functional aspects of physiological control. These general  
186 architectures are presented as a scaffold for understanding the specific architectures used in  
187 various speech motor control models, and also for the purpose of clarifying the terms used in  
188 the present paper to refer to those architectures. To illustrate these various architectures in  
189 an intuitive way, the example of the planar robotic arm will continue to be employed as in

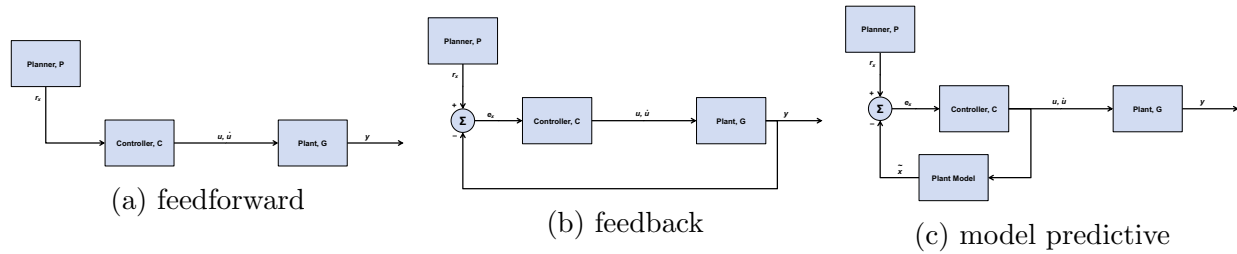

FIG. 4. Control architecture of a generic (a) feedforward, (b) feedback, and (c) model predictive controller. The feedforward control architecture is distinguished from the other two because the controller only receives information from the planner, not information from the plant or predicted information from the plant. The feedback control and model predictive control architectures differ in the nature of the feedback received by the controller. In feedback control, the state of the plant (different than the output) is sent back to the controller. By contrast, in model predictive control, the state of the plant is sent back to the controller using an estimate of the plant based on a copy of the issued control signal.

190 the previous section. However, these same architectures can be used to control much more  
 191 complex systems, such as the speech production system.

### 192 **1. Feedback control**

193 Figure 4b shows an example of a *feedback* system architecture that, by definition of the  
 194 term, makes use of outputs from the plant for maintaining control. These feedback signals,  
 195 which convey the sensory state vector, are compared with the reference vector from the  
 196 planner in order to generate an error vector. The error vector, in its most basic form, simply  
 197 represents the difference between the current state and the reference. The error vector is  
 198 passed to the controller for determining the motor command. This type of controller is

199 often referred to as a *closed-loop controller* in the control theory literature, since the flow  
200 of signals through the system form a loop from the motor command to the error signal and  
201 back again. Many types of controllers exist which match this general description, only a few  
202 of which will be discussed here. What all feedback controllers share is the basic idea that  
203 the error between the state of the plant (or an estimate thereof) and the reference forms the  
204 basis for the motor command issued to the plant. The simplest feedback controller design is  
205 the proportional controller, in which the motor command is simply proportional to the error  
206 signal – e.g.,  $C(\mathbf{e}_x) = \mathbf{K}_p \mathbf{e}_x$ , where the term  $\mathbf{K}_p$  is a matrix of weights known as the *gains*.  
207 Larger gains lead to larger motor commands (i.e. the error has more of an effect on the  
208 system) while smaller gains result in smaller commands. Smaller gains are often preferable  
209 as large gains can lead to instability and oscillatory behavior.

210 The second row in Figure 3 shows, across times  $t_1$ ,  $t_2$  and  $t_3$ , the progress of the robotic  
211 arm as controlled by a feedback controller. At the beginning, the task is defined as a  
212 desired point in task space  $\mathbf{x} = (x_1, x_2)$ . This type of task is sometimes referred to as a  
213 point-attractor, or a target, since the system should evolve to approach this point in task  
214 space regardless of its initial position, given sensible motor commands that reduce the error  
215 signal over time. The motor commands issued at each time step are a function of the error,  
216  $\mathbf{e}_x$ , between the current position of the end-effector and the point target. The error is  
217 determined by sensory feedback, which provides monitoring of the current state of the arm  
218 with respect to the position of the target.<sup>2</sup> Although the error signal is in task space, the  
219 motor command issued by the controller must be given in mobility space since the only way  
220 to change the position of the end effector is to change the joint angles  $\mathbf{u} = (u_1, u_2)$ . The

221 process of determining those commands requires some kind of transformation (i.e., kinematic  
222 inversion) from the desired coordinates in task space to corresponding coordinates in mobility  
223 space. Alternatively, it is also possible for the target to be a pre-specified trajectory rather  
224 than a point in task space. In this case, the error would be computed between the current  
225 position of the end-effector and the current desired position along the trajectory (typically  
226 time-locked).

227 Feedback control architectures have wide applicability in engineered and biological sys-  
228 tems. Even simple designs typically lead to systems that accurately produce desired behav-  
229 iors, and which can naturally handle unstable or unpredictable environments, including ex-  
230 ternal perturbations to the plant. However, feedback systems can require careful calibration  
231 to ensure stability of control. Incorrectly tuned feedback systems can result in movements  
232 that grow uncontrollably or oscillate indefinitely. Feedback architectures are also heavily de-  
233 pendent on the quality of feedback signals. If those signals are slow to propagate, or if they  
234 require extensive processing once received, this can lead to motor commands being issued  
235 based on outdated state information, resulting in poor and/or slow performance. Addition-  
236 ally, if feedback signals are corrupted or otherwise inaccurate, this can lead to inaccurate  
237 movements. These final considerations are particularly important for biological systems, as  
238 there are substantial delays and noise inherent to neural processing of sensory feedback.

## 229 ***2. Feedforward control***

240 One way to avoid the problems of delayed and noisy sensory information is to cut out the  
241 use of feedback entirely. Figure 4a shows an example of a system architecture that makes

242 no use of any outputs from the plant for maintaining control. Rather, the signals issued  
243 in the system are entirely *feedforward*, with the motor commands depending only on the  
244 reference signal. This architecture is commonly referred to as an *open-loop* control system,  
245 although the terms *feedforward* and *open-loop* will be used interchangeably in the present  
246 paper. The term feedforward control is sometimes used more specifically to refer to control  
247 architectures that can monitor perturbations to the plant, and adjust the motor commands  
248 to compensate without the need for explicitly monitoring outputs from the plant, usually  
249 by employing a highly accurate mathematical model of the plant (see the section on model  
250 predictive control, below). To date, the authors are aware of only one modeling effort in the  
251 domain of speech motor control to utilize this kind of architecture ([Baraduc et al., 2017](#)),  
252 with preliminary results presented.

253 The first row in Figure 3 shows the progress of the robot arm as controlled by a feed-  
254 forward controller. From the beginning, the trajectory of the end-effector is defined in  
255 task space as a straight line originating at the end-effector's current position. The motor  
256 commands issued to the arm at each time step are directly determined by this pre-specified  
257 trajectory. As in a feedback controller, the reference signal is defined in task space but motor  
258 commands must be issued in mobility space. Again, this requires some kind of transforma-  
259 tion from the desired coordinates in task space to corresponding coordinates in mobility  
260 space. Although the trajectory in this example is specified in task space, as is often done,  
261 an alternative feedforward controller could define the plan in mobility space (that is, for our  
262 robot example, in terms of joint angles) or even simultaneously in mobility and task space.  
263 In any case, a key aspect of feedforward control is that no estimate of the state (that is, the



264 arm's estimated position) is used by the controller at any point throughout its movement.  
265 In the absence of feedback, the simplest method of generating reasonable control signals is  
266 simply to have the plan pre-specify the entire trajectory in task or mobility space, and then  
267 issue motor commands that attempt to carry out that plan step-by-step from beginning to  
268 end.

269 Feedforward control architectures are unsuitable for unstable or unpredictable environ-  
270 ments, where the plant can be perturbed by interference external to the system. Without  
271 the ability to detect and monitor errors in the system output, errors tend to persist, or even  
272 compound over time. Despite this obvious disadvantage, feedforward architectures are some-  
273 time attractive because they are capable of issuing motor commands quickly and without  
274 the need for complex handling of feedback signals.

### 275 **3. *Model predictive control***

276 An alternative to feedforward and feedback control is *model predictive* control. A model  
277 predictive controller, like the feedforward controller, makes no use of outputs from the plant  
278 for maintaining control. However, this architecture does make use of an *internal model* of  
279 the plant, which takes motor commands as input and transforms them into a prediction of  
280 the system's subsequent state, to predict the effects of the issued motor command. This  
281 effectively replaces feedback from the plant with a prediction of what the controller thinks  
282 that the feedback should be (Garcia *et al.*, 1989; Miall and Wolpert, 1996). An example  
283 of this architecture is shown in Figure 4c. This state prediction acts as a kind of pseudo-

284 feedback which can be compared against the reference, producing an error signal that is  
285 provided to the controller.

286 Note that model predictive control can be viewed as a special case of feedforward control,  
287 if the plant model is considered to be part of the controller. This special case has been  
288 separated out as a distinct architecture in the present framework because it is central to  
289 several models of speech motor control. Therefore, feedforward architectures, as discussed  
290 here, will specifically discount architectures that are model predictive.

291 The third row in Figure 3 shows the progress of the robot arm as controlled by a model  
292 predictive controller. The functioning of such a controller is similar to the feedback controller  
293 example, above, in that the target is defined as desired point in task space, and the motor  
294 commands issued are a function of the error,  $\mathbf{e}_x$ , between the current position of the end-  
295 effector and the point target. The difference is that the error is determined by comparing  
296 the desired state to the output of an internal model.

297 In terms of performance, the primary advantage of such an architecture is speed, since  
298 the delays associated with predicting the plant's state can often be much shorter than those  
299 associated with feedback propagation. Additionally, a model predictive controller is one way  
300 to avoid the need for having an entire trajectory formulated before movement begins, as is  
301 often the case with feedforward architectures. Rather, plans can be more compact, such as a  
302 single, time invariant point in task or mobility space (this is the same type of plan often used  
303 in feedback controllers). The disadvantage of these systems is that accurate internal models  
304 can be difficult to design or learn, especially for complex, nonlinear plants such as the vocal  
305 tract. A poor internal model would mean that the predicted state may not match the true

306 state of the plant, which can result in inaccurate control. Even small errors in the prediction  
307 will accumulate over time, since there is no way of correcting the prediction. Additionally,  
308 model predictive controllers have similar problems as feedforward control architectures in  
309 dealing with unpredictable environments and perturbations.

#### 310 **4. *Combining feedforward and feedback controllers***

311 Each basic type of control system, feedback and feedforward control, has its own strengths  
312 and weaknesses. Feedback control is stable in the face of external perturbations, but becomes  
313 inaccurate or slow when sensory information is noisy or delayed (respectively), as in most  
314 biological systems. Feedforward control can be accomplished quickly, but is unstable when  
315 the state of the system cannot be predicted due to external perturbations.

316 It is possible to combine some of the strengths of feedforward and feedback systems, and  
317 mitigate the weaknesses of each, by constructing a *hybrid feedforward/feedback* controller, as  
318 shown in Figure 5a. This hybrid architecture comprises separate feedforward and feedback  
319 pathways that each issue their own motor commands, a (potentially weighted) combination  
320 of which becomes the final motor command that is issued to the plant. Such an architecture  
321 has the speed of a feedforward controller, but remains sensitive to unexpected perturbations  
322 and accumulating errors. Typically, the presence of the feedforward pathway allows for  
323 lower gains to be utilized in the feedback controller, leading to better stability. The primary  
324 disadvantage of combining feedforward and feedback pathways into a single system is the  
325 introduction of more complex designs. Complex designs may be more difficult to maintain,  
326 and allow the potential for unnecessary or underutilized components. For instance, if output

## JASA/Speech Motor Control Models

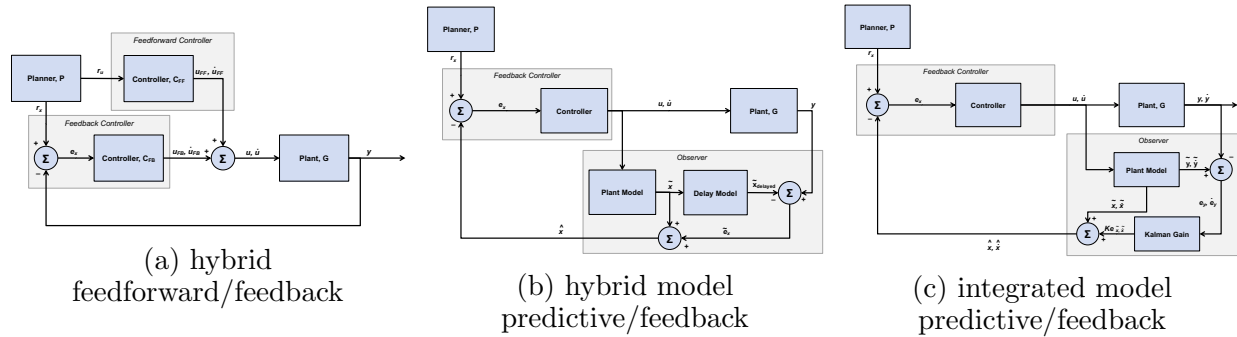

FIG. 5. Control architectures of generic hybrid controllers. A hybrid controller uses two of the three simple control architectures discussed in Figure 4. Diagrammed here are (a) a feedforward-feedback hybrid, (b) a model predictive-feedback hybrid with simple summation of state predictions (i.e., a Smith predictor) and (c) a model predictive-feedback hybrid with full integration of state predictions (i.e., a Kalman filter). Architectures (b) and (c) are distinguished by the specific way in which model predictions and feedback are combined. In (b), the current state is estimated through a three-part error comparison processes. Architecture (c) also uses a three-part comparison, but also incorporates an observation model that maps the model prediction into sensory space, and a gain that allows for potentially variable weighting of model predictions and sensory measurement error.

327 from the plant always equals the reference (e.g., if the environment is entirely predictable),  
 328 then the feedback pathway is not utilized and essentially unnecessary, since the feedforward  
 329 pathway would be sufficient for control by itself.

330 One of the most useful applications of model predictive control is as a component of larger,  
 331 hybrid architectures. For instance, internal model predictions can provide quick pseudo-  
 332 feedback that can be used in conjunction with true feedback to provide fast, reliable control  
 333 even in the face of long feedback propagation delays. Such methods are more stable than true

334 model predictive control, since internal predictions do not need to be perfectly accurate, and  
335 small deviations between the predicted and actual states of the plant can be corrected via  
336 the feedback signal. An example of an architecture that exemplifies this concept is the Smith  
337 predictor (Ghosh, 2005; Smith, 1959), as shown in Figure 5b. A Smith predictor effectively  
338 has three error comparison processes, generating state errors serially through comparing the  
339 state with a delayed version of the internal model prediction, which in turn is compared  
340 to a non-delayed internal model prediction, with this final comparison being subsequently  
341 compared against the desired state from the reference signal. The integrated mechanisms  
342 involved in combining model predictions with feedback signals are sometimes referred to in  
343 the literature as the “observer”. The present view adopts this terminology. Note that the  
344 observer and speaker, in this conceptualization, are the same individual, as speakers observe  
345 their own speech.

346 A Smith predictor is not the only controller that uses both state predictions from an  
347 internal model and feedback signals. Prominent alternative approaches also use a three-part,  
348 cascaded error comparison process, but incorporate (a) an observation model, that maps the  
349 model prediction into sensory space for direct comparison with sensory measurements, and  
350 (b) a gain that allows for potentially variable weighting of model predictions and sensory  
351 measurement error. These additional aspects can afford more accurate estimation of the  
352 plant’s current state. This is the approach taken by such classic control designs as the  
353 Kalman filter (Kalman *et al.*, 1960) (Figure 5c), which provides an optimal<sup>3</sup> state estimate  
354 with noisy feedback under certain strict assumptions. Importantly, the estimated state that  
355 results from combining internal predictions and feedback can be compared with the desired

356 state to generate a motor command (Todorov, 2004), just as in a pure feedback controller.  
357 This type of controller is sometimes referred to as *state feedback control*.

### 358 C. Speech models

359 The present discussion will now move from domain-general motor control theory to models  
360 of speech motor control. Among the speech production models presented in the literature,  
361 perhaps the two most prominent are DIVA (Directions Into Velocities of Articulators) and  
362 the Task Dynamics model. The development of DIVA has been driven since the mid-  
363 1990's (Guenther, 1994) primarily by a team of researchers at Boston University, led by  
364 Frank Guenther. Task Dynamics has been developed by researchers associated with Haskins  
365 Laboratories, with Elliot Saltzman playing a key role, and with the theoretical groundwork  
366 being laid about five years prior to DIVA (Saltzman and Kelso, 1987; Saltzman and Munhall,  
367 1989). More recent models include State Feedback Control (Houde and Nagarajan, 2011),  
368 the Feedback Aware Control of Tasks in Speech (FACTS) model (Parrell *et al.*, 2006), ACT  
369 (Kröger *et al.*, 2009), and GEPPETO (Perrier *et al.*, 2005).

370 Any model of speech production control must include, at a basic level, the ability to  
371 generate motor commands based on some motor plan. Those motor commands in turn  
372 activate a vocal tract model, possibly resulting in the generation of an acoustic signal. While  
373 complete models of speech production also need to include the formulation of motor plans,  
374 these elements are beyond the scope of the present paper, which focuses more narrowly  
375 on controlling the vocal tract for speech. An important reason for limiting the scope of  
376 the present paper is that the longstanding debate over acoustic vs. articulatory targets

377 of speech production tasks is often intertwined with the critical issue of how the vocal  
378 tract is controlled. For example, DIVA's tasks are formulated primarily in acoustic space,  
379 whereas applications of Task Dynamics (e.g., the Articulatory Phonology of (Browman and  
380 Goldstein, 1986) often assume tasks to be constrictions in the vocal tract. The choice of  
381 task space, however, is almost completely independent of the control formulations that are  
382 the focus of the current paper, and it is generally possible to reformulate any given control  
383 architecture using different task spaces. Therefore, the present work will discuss the task  
384 space used for each model, as the specific choice of task variables comprising the task spaces  
385 does differ between models, but will make no attempt to discuss the relative merits of the  
386 different task spaces used in different models. The concept of a task space is general enough  
387 to sit over and above the specific choice of task variables, while being well-defined enough as  
388 a concept to allowing meaningful comparisons of the control architectures underlying task  
389 space control.

390 Control elements that are relevant to any model of speech motor control, and which will  
391 be discussed in depth for each model in the following section, include: (a) the nature of  
392 feedforward mechanisms of control, including the formulation of the planner, (b) the nature  
393 and importance of feedback signals, (c) modeling of potentially imperfect sensory systems  
394 and/or perceptual processing of feedback, (d) the consequences of delays in feedforward and  
395 feedback pathways (e) the potential role of forward models in state prediction, and (f) the  
396 potential integration of both feedback and state predictions for state estimation, (g) the  
397 implementation of transformations between task space, mobility space, and sensory space,  
398 (h) the design of the controller for generating and issuing motor commands to the plant.

399 It is noted here that most current speech models are examples of purely kinematic con-  
400 trollers. That is, they do not account for dynamics or biomechanical considerations of the  
401 vocal tract. It is typically assumed that inertial parameters, centrifugal/coriolis forces and  
402 stationary external forces like gravity can all be ignored for the purposes of controller design  
403 and forward modeling. This may owe to the fact that several prominent models of the plant  
404 are purely kinematic: for instance, Maeda’s model (Maeda, 1982) and the Haskins Config-  
405 urable Articulatory Synthesizer (CASy) (Iskarous *et al.*, 2003; Rubin *et al.*, 1981, 1996).  
406 The focus on kinematics may also reflect an implicit assumption that dynamics of the plant  
407 can be ignored in the domain of speech motor control. Such an assumption is quite common  
408 in robotics and human motor control, and amounts to conceptualizing the plant as a collec-  
409 tion of stiff articulators, akin to an industrial robotic arm. However, there is evidence that  
410 biomechanical factors play non-negligible roles in speech motor control (Buchaillard *et al.*,  
411 2009; Derrick *et al.*, 2015; Nazari *et al.*, 2011; Ostry *et al.*, 1996; Perrier *et al.*, 2003; San-  
412 guineti *et al.*, 1998; Shiller *et al.*, 2002), and more recent vocal tract models such as Artisynth  
413 (Lloyd *et al.*, 2012) incorporate dynamic and biomechanical aspects in their design.

### 414 III. PROMINENT MODELS OF SPEECH PRODUCTION

415 In the following section, each of the current models of speech motor control will be  
416 discussed in turn, explaining the architecture of the control system as it relates to the simple,  
417 domain-general systems discussed previously. Where necessary, additional components of  
418 each model will be touched upon, such as motor program generation. How each model  
419 addresses the key control elements listed above will also be discussed.



## 420 A. DIVA

421 The Directions Into Velocities of Articulators (DIVA) model is a hybrid control system  
422 combining a model-predictive controller with separate auditory and somatosensory feedback  
423 controller loops (Golfinopoulos *et al.*, 2011; Guenther *et al.*, 2006; Tourville and Guenther,  
424 2011). Being arguably the most complete computational model of speech motor control,  
425 DIVA has been developed to address a number of theoretical issues, primarily focused around  
426 replicating human speech production at behavioral, neurological, and developmental levels.  
427 The use of both model predictive and feedback control in DIVA is conceptually similar  
428 to a Smith Predictor. However, while a Smith Predictor uses serial error calculations to  
429 issue a single motor command, DIVA generates independent errors from each controller  
430 simultaneously. Each error is then individually transformed into a separate motor command.  
431 These three commands are then combined into a single motor command which is passed to  
432 the plant. The plant in DIVA has historically been Maeda’s model (Tourville and Guenther,  
433 2011), but this has recently been replaced with a custom plant model (Guenther, 2016).

434 The basic component of the planning process in DIVA is the “speech sound”, which can  
435 be a phoneme, syllable, or multisyllabic chunk. Each speech sound is linked to three distinct  
436 tasks, each a function of time: an articulatory trajectory (often called “motor” trajectory in  
437 the DIVA literature) defined in mobility space  $\mathbf{r}_u(t)$ , an auditory sensory trajectory  $\mathbf{r}_{aud}(t)$ ,  
438 and a somatosensory trajectory  $\mathbf{r}_{somat}(t)$ . The “speech sound map”, which corresponds  
439 to the planner in Figure 4b, stores all three-component sets of mobility and sensory state  
440 trajectories. Each trajectory of the set serves as the reference signal to one of the controllers

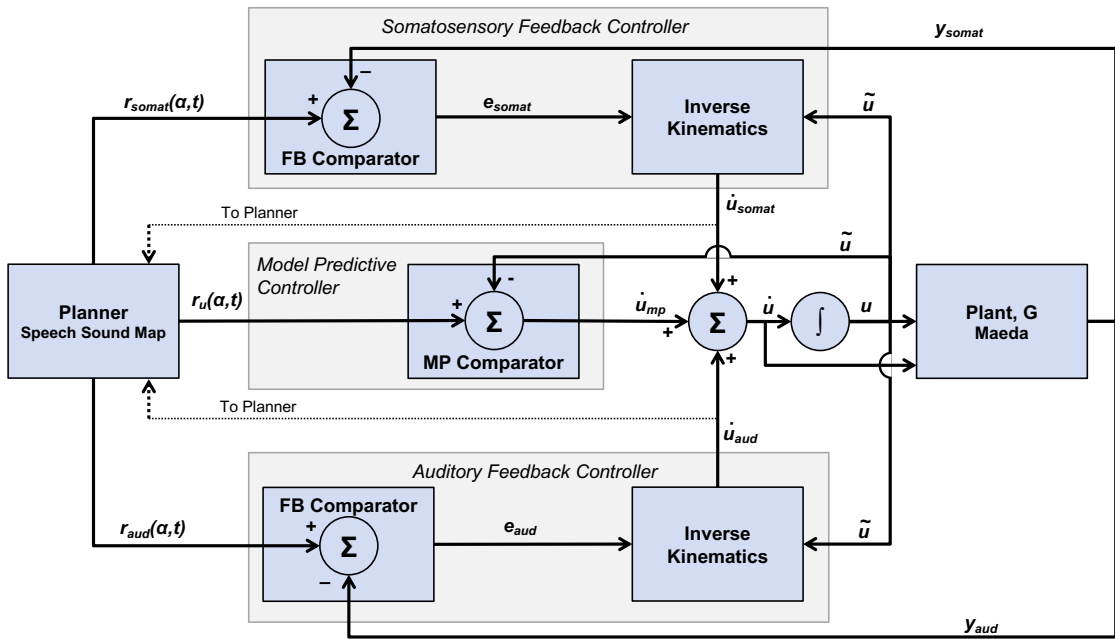

FIG. 6. Control architecture of the DIVA model. The DIVA model has two feedback paths, auditory and somatosensory, that are schematically identical, and a model-predictive pathway. The feedback pathways compute an error between the planner's signal and the output of the plant. This error is then used in conjunction with the state of the plant,  $u$ , to create a feedback control signal similar to the integrated model predictive-feedback control in Figure 5c. The model predictive pathway compares the desired position of the speech articulators with their current predicted position.

441 in DIVA: the articulatory trajectory serves as input to the model-predictive controller, and  
 442 the sensory trajectories serve as input to the respective auditory and somatosensory feedback  
 443 controllers. The three-component representation of speech sounds in DIVA means that each  
 444 speech unit has a fully-specified articulatory trajectory and time-locked sensory expectations.  
 445 Uniquely among models discussed in the present paper, the sensory expectations are not  
 446 generated online through an internal model, as in a state feedback controller.

447 The model predictive component of DIVA compares the predetermined desired position  
448 of the speech articulators at each point in time,  $\mathbf{r}_u(t)$ , with their current predicted position,  
449  $\tilde{\mathbf{u}}$ , generating a control signal,  $\dot{\mathbf{u}}_{mp}$ . Implicitly, this assumes the existence of an internal  
450 model (not explicitly shown) that is able to predict the kinematic consequences of the motor  
451 commands with perfect accuracy. In order to generate the mobility state prediction, DIVA  
452 integrates the control signal over time. This enables comparison of the estimated state of the  
453 vocal tract articulators  $\tilde{\mathbf{u}}$  with the reference signal  $\mathbf{r}_u(t)$  independently of sensory feedback.  
454 Although the model-predictive controller is typically referred to as the “feedforward” con-  
455 troller in the DIVA literature, it is not a typical feedforward controller in the sense of “open  
456 loop” control traditionally described in control systems, because it relies on a comparison be-  
457 tween the predicted current model state and a reference. In its current implementation, the  
458 predicted state also incorporates some auditory and somatosensory feedback information,  
459 as well, since those pathways converge with the model predictive pathway. However, if the  
460 auditory and somatosensory feedback controllers in DIVA are entirely removed, the model  
461 predictive controller would function appropriately in the absence of sensory information.

462 In the model predictive controller, the control signal is generated from the following  
463 equation:  $\dot{\mathbf{u}}_{mp} = g_{mp}G[\mathbf{r}_u(\alpha, t) - \tilde{\mathbf{u}}]$ , where  $g_{mp}$  is a scalar amplification gain applied to the  
464 motor command, and  $G$  is an additional gain that can be interpreted as a “go” signal, ranging  
465 between 0 (no movement) and 1 (maximal movement speed) as in [Bullock and Grossberg](#)  
466 [\(1988\)](#). Thus, the motor command is essentially a scaled version of an error signal, where the  
467 relevant error is between the articulatory reference signal and the predicted current position  
468 of the plant in mobility space. Note that the version of  $u$  that is used in computing the

469 error signal is neither the true position of the articulators in mobility space, nor the one  
470 measured from the plant via sensory feedback, but an internal estimate of this state,  $\tilde{\mathbf{u}}$ . This  
471 estimate is generated by integrating the summed motor commands from all three controllers,  
472 and is equal to the motor position command issued to the plant. Effectively, the quantity  
473  $\mathbf{r}_u(\alpha, t) - \tilde{\mathbf{u}}$  is an approximation of  $\dot{\mathbf{u}}$  prior to scaling. The predicted current position of  
474 the plant is used purely as a way of converting the reference signal into a velocity, because  
475 the reference signal (a set of articulatory positions) cannot be used directly as a motor  
476 command (which must specify a change in those positions). Alternative ways of computing  
477 the motor command would eliminate the need for the model-predictive component of the  
478 feedforward controller, converting it into a true “open-loop” system. For example, the  
479 planner could approximate the first derivative of the entire articulatory plan, and issue that  
480 as the reference signal. Alternatively, the planner could issue the reference signal within a  
481 window surrounding the current time point, which would allow the controller to approximate  
482 the first derivative. Further details can be found in Appendix A.

483 The auditory and somatosensory feedback controllers closely follow the generic feedback  
484 control architecture. The auditory task space in DIVA is defined as the first three formants  
485 (F1-F3) and the somatosensory task space is defined as the positions of the individual ar-  
486 ticulators (proprioception) as well as the degree of contact between separate articulators  
487 (tactile sensation). Several publications have also envisioned the somatosensory space in-  
488 cluding representations of constriction locations and degrees, as in Task Dynamics (refer  
489 to sections describing Task Dynamics, below). The computations performed by the sen-  
490 sory feedback controllers in DIVA begin with a comparison between the reference signal

491 and the sensory output of the plant to produce an error signal in sensory space. For the  
492 sake of simplicity, only the auditory feedback computations will be presented here, but the  
493 form is the same for the somatosensory pathways. The auditory error signal is defined as:  
494  $\mathbf{e}_{aud} = \mathbf{r}_{aud}(\alpha, t) - \mathbf{y}_{aud}$ . This auditory task-space error is then transformed into a mobility-  
495 space error via the inverse kinematic equation:  $\dot{\mathbf{u}}_{aud} = g_{aud} \mathbf{J}(\tilde{\mathbf{u}})^{-1} \mathbf{e}_{aud}$ . The matrix  $\mathbf{J}(\mathbf{u})$  is  
496 known as the Jacobian, which provides a mapping between changes in mobility space and  
497 changes in task space. This mapping is dependent on the current mobility state ( $\mathbf{u}$ ) or, as in  
498 DIVA, a prediction of that state ( $\tilde{\mathbf{u}}$ ). Specifically in DIVA, the Jacobian contains the rate of  
499 change for each of the dimensions of the task space for a corresponding change in mobility  
500 space. The matrix  $\mathbf{J}(\mathbf{u})^{-1}$ , is a pseudoinverse of the Jacobian, which allows for transforming  
501 task-space changes into mobility-space changes. The final motor command is then generated  
502 as the transformed error signal multiplied by a fixed gain,  $g_{aud}$ . This represents a kind of  
503 proportional control, where the motor command, ignoring transformations for the moment,  
504 is simply a scaled version of the error signal. Further details can be found in Appendix A.

505 The output of the model predictive controller and sensory feedback controllers are  
506 summed to generate the final control signal,  $\dot{\mathbf{u}}$ . Thus, the final control signal passed to  
507 the plant is the velocity of the articulators (or  $\dot{\mathbf{u}}$ ) needed to produce the desired change in  
508 the position of the articulators (termed *motor movement command*). The control signal  
509 additionally includes the integration of  $\dot{\mathbf{u}}$  over time ( $\mathbf{u}$ , or *motor position command*). This  
510 combined motor movement and position command is passed to the plant to drive changes  
511 in the position of the articulators. The plant also produces sensory outputs based on the  
512 position of articulators at each time point,  $\mathbf{y}_{aud}$  and  $\mathbf{y}_{somat}$ . In DIVA, the output of the

513 plant is in the space of the reference signal (F1-F3 for the auditory reference, position of  
514 the articulators as well as articulator contact for the somatosensory reference). This avoids  
515 needing to model an auditory or somatosensory perceptual system.

516 An important detail to note is that the auditory and somatosensory reference signals  
517 are specified not as unique trajectories with a single value at each time point, but as time-  
518 varying regions. The error signal for each space (auditory or somatosensory) is the distance  
519 from the current state to the edge of these regions. Thus, larger regions will allow greater  
520 variability in production, as no corrective error signal will be generated for any production  
521 that falls within the target region.

522 DIVA simulations have been able to qualitatively match human behavioral responses  
523 to auditory and mechanical perturbations ([Guenther \*et al.\*, 2006](#); [Tourville \*et al.\*, 2008](#);  
524 [Villacorta \*et al.\*, 2007](#)). The model has also been used to derive variable productions of /r/  
525 ([Nieto-Castanon \*et al.\*, 2005](#)) based on a particular auditory target (low F3), a so-called  
526 “trading relationship” or “motor equivalence” where multiple articulatory configurations  
527 can be used for the same phoneme. Some older versions of DIVA that used time-invariant  
528 targets are also able to model carry-over and anticipatory coarticulation through the use of  
529 convex target regions ([Guenther \*et al.\*, 1995](#)).

530 Speech acquisition and learning have also received substantial consideration in the devel-  
531 opment of DIVA. The primary mechanism for learning within the model involves updating  
532 the motor plan based on generated auditory and somatosensory feedback motor commands.  
533 Details of this adaptive modification to the motor plan fall outside the scope of the present  
534 review. Nonetheless, this pathway is indicated by an open, labelled arrow in [Figure 6](#).

535 In addition to establishing the architecture of the speech motor control system, one of the  
536 primary motivations behind DIVA is establishing the neural basis of speech motor control.  
537 Individual components of DIVA have been mapped onto particular brain regions based on  
538 experimental neuroimaging results and model simulations (Bohland *et al.*, 2006; Ghosh *et al.*,  
539 2008; Golfinopoulos *et al.*, 2011; Guenther *et al.*, 2006; Tourville *et al.*, 2008), and simulation  
540 studies have provided good matches to behavioral and neural activity recorded from human  
541 speakers during auditory and somatosensory perturbation experiments (Golfinopoulos *et al.*,  
542 2011; Niziolek *et al.*, 2013; Tourville *et al.*, 2008; Villacorta *et al.*, 2007).

## 543 B. Task Dynamics

544 The primary focus of the Task Dynamics model has been to model how invariant linguistic  
545 targets can generate continuous and context-dependent articulatory movements. The central  
546 hypothesis of this model is that articulatory movements are directed by the evolution of a  
547 task-level dynamical system whose invariant parameters are determined by the linguistic  
548 content of an utterance. TD was formulated by Saltzman and Kelso (1987) in general  
549 motor terms, and then by Saltzman and Munhall (1989) in the particular context of speech  
550 production (see Figure 7). TD is essentially a feedback control architecture, as described in  
551 Figure 7. The controller uses a feedback comparator to relate the desired state issued by the  
552 planner ( $\mathbf{r}_x(\alpha, t)$ ) to the current state of the system ( $\mathbf{x}$ ). On the basis of this comparison ( $\mathbf{e}_x$ ),  
553 the controller computes a desired acceleration in task space ( $\ddot{\mathbf{x}}$ ) which is then transformed  
554 into a desired acceleration in mobility space ( $\ddot{\mathbf{u}}$ ). A crucial aspect of Task Dynamics is that  
555 both the desired state issued by the planner and the comparison performed by the controller

556 occur in task space, not mobility space. This necessitates a transformation of the desired  
 557 acceleration in task space into mobility space before it can be utilized as a motor command.  
 558 The plant in the Task Dynamics model is the CASY model (Iskarous *et al.*, 2003; Rubin  
 559 *et al.*, 1996), which is a geometric model of the vocal tract, similar in spirit to Maeda's  
 560 model.

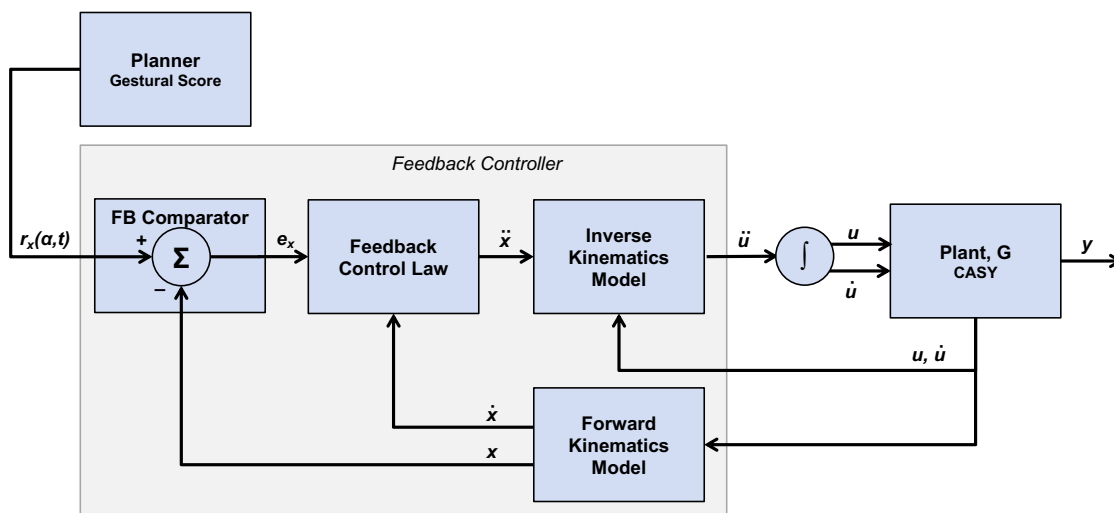

FIG. 7. Control architecture of the Task Dynamics model. The system state,  $\mathbf{x}$ , is broken out as both the state and change in state (first derivative),  $\dot{\mathbf{x}}$ . This information is used by the controller in the rectangle. Comparing this diagram to Figure 4b, one can see TD is a feedback control architecture.

561 One view represented in the literature and in the community of Task Dynamics is that  
 562 it does not incorporate a feedback process. This misconception was perhaps most recently  
 563 mentioned in print by Kröger and Birkholz (2007) who stated that a serious problem with  
 564 the Task Dynamics approach has been the fact that “perception [presumably feedback] as  
 565 a control instance for production is not considered”. Based on the discussion above, it



566 should be clear that Task Dynamics is, in fact, primarily a feedback-driven system. One  
567 criticism that could be made of task dynamics, however, is that the model, as implemented,  
568 treats the feedback process as noiseless and instantaneous, which is overly simplistic. Given  
569 that the focus in task dynamics was on the development of the dynamic control law, this  
570 simplification would seem to stem from the specific emphases and interests of the authors,  
571 rather than some central conceptualization of speech motor control. Such was suggested  
572 by the authors in at least one publication (Saltzman and Kelso, 1987). It is also true that  
573 TD does not incorporate auditory feedback, which may, indeed, be a central property of  
574 the model. Similarly, the model assumes that the current state of the plant in mobility  
575 space is directly reflected via somatosensory feedback. Note that this is essentially the  
576 same assumption that DIVA makes, where part of the sensory feedback signal is simply the  
577 positions of the articulators.

578 The computations performed by the controller in TD begin with a comparison between  
579 the (task-space) reference signal and the task-space position of the plant to produce an error  
580 signal:  $\mathbf{e}_x = \mathbf{r}_x(\alpha, t) - \mathbf{x}$ . The error signal is then used, along with the task-space velocity  
581 of the plant,  $\dot{\mathbf{x}}$ , to update the task-space acceleration of the plant via the feedback control  
582 law (called the “forward dynamics equation” in the literature):  $\ddot{\mathbf{x}} = -M^{-1}B\dot{\mathbf{x}} - M^{-1}K\mathbf{e}_x$ ,  
583 where  $M$  is a diagonal matrix of inertial parameters,  $B$  is a diagonal matrix of damping  
584 coefficients, and  $K$  is a matrix of stiffness coefficients. Thus, the feedback control law takes  
585 the form of a second-order dynamical system that transforms the error signal into the second  
586 derivative of the task-space variable  $\mathbf{x}$ . Since the task-space acceleration cannot be used  
587 directly as a motor command, it is necessary to transform this task-space acceleration into

588 a mobility-space acceleration ( $\ddot{\mathbf{u}}$ ). This is accomplished through the use of a pseudo-inverse  
589 Jacobian function:  $\ddot{\mathbf{u}} = \mathbf{J}^{-1}(\mathbf{u})[\ddot{\mathbf{x}} - \dot{\mathbf{J}}(\mathbf{u}, \dot{\mathbf{u}})\dot{\mathbf{u}}]$ . This mobility space acceleration can then be  
590 integrated to produce mobility-space velocity and position signals,  $(\mathbf{u}, \dot{\mathbf{u}})$ , that can be used  
591 by the plant to drive changes in the position of the speech articulators. Further details can  
592 be found in Appendix A.

593 TD views speech motor control as a problem of point attractor dynamics. That is, motor  
594 tasks are conceptualized as points in task space, toward which the system is drawn by means  
595 of some governing control law which is a function of the system state. Task Dynamics de-  
596 scribes the control law as a damped oscillator system (i.e., second-order dynamical system).  
597 Damped oscillator dynamics have a number of desirable properties in terms of defining a  
598 control law. In addition to the fact that damped oscillator dynamics are well-understood  
599 and easily characterized, the use of such dynamics to model task-directed behavior has the  
600 advantages that action patterns will be globally smooth and continuous.

601 TD is closely related to proportional-derivative control. It is common practice in engi-  
602 neering control systems to take integral or derivative information of the error signal into ac-  
603 count (e.g., the ubiquitous proportional-derivative, PD, and proportional-integral-derivative,  
604 PID, controllers – e.g., [Åström and Hägglund \(1995\)](#)). Integrating the feedback error, for  
605 instance, allows a controller to recognize accumulated errors, which it can then attempt  
606 to nullify. Using the derivative of the feedback error, on the other hand, can minimize  
607 undesirable future trends in the error signal, such as overshoot, oscillation and instabil-  
608 ity. In PD control, the control signal  $\mathbf{u}_{PD}$  is simply a weighted combination (given some  
609 weight matrices  $K_P$  and  $K_D$ ) of the error signal and its first derivative with respect to time:

610  $\mathbf{u}_{PD} = K_P \mathbf{e}_x + K_D \dot{\mathbf{e}}_x$ . This equation looks remarkably similar to the feedback control law  
611 from TD:  $\ddot{\mathbf{x}} = -M^{-1}B\dot{\mathbf{x}} - M^{-1}K\mathbf{e}_x$ , except that weights are specified, and  $\dot{\mathbf{x}}$  is substituted  
612 for  $\dot{\mathbf{e}}_x$ . It can be easily shown that  $\ddot{\mathbf{x}} = \mathbf{u}_{PD}$ , given that  $K_P = M^{-1}K$  and  $K_D = M^{-1}B$ ,  
613 and knowing that  $\mathbf{r}_x$  has a constant value, and therefore  $\dot{\mathbf{r}}_x = 0$ . Thus, TD is equivalent to  
614 PD control up to the generation of the task variable acceleration signal, but differs in the  
615 additional transformation of the task space variables into mobility space, and integration of  
616 the mobility space variables.

617 The task space in TD is defined in terms of high-level articulatory tasks (in contrast to  
618 the positions of the individual articulators themselves). For speech, the tasks are suggested  
619 to be constriction actions (i.e., gestures) of the vocal tract, such as achieving closure of the  
620 lips, rather than the positions of the individual speech articulators (for the lip closure task,  
621 these would include the upper and lower lips as well as the jaw). A point attractor task  
622 is derived by the planner from a time-varying “gestural score” that issues the desired task  
623 state as a function of the currently active articulatory gestures. This definition allows TD to  
624 be easily put together with Articulatory Phonology (Browman and Goldstein, 1986). These  
625 two components form the basis for the perspective on speech production widely associated  
626 with Haskins Laboratories. Nevertheless, Task Dynamics and Articulatory Phonology are  
627 separate models that address different questions. Articulatory Phonology – proposed roughly  
628 in parallel with Task Dynamics – asserts that articulatory gestures are the primitive units  
629 of spoken language. Gestures themselves are conceptualized with AP as discrete vocal tract  
630 constriction actions, which can be composed into gestural “scores” that function as a motor  
631 program for a given utterance. Therefore, in broad terms, Articulatory Phonology addresses

632 the question of how speech tasks should be defined, and how they can be composed into a  
633 motor program, whereas Task Dynamics addresses the question of how those tasks can be  
634 achieved and how that motor program can be realized in a physical system.

635 Use of second-order dynamics directly connects TD to research on action planning and  
636 execution in biological systems. For instance, the VITE model is an influential neural-  
637 inspired network model for explaining kinematic trajectory formation of directed movement  
638 ([Bullock and Grossberg, 1988](#)). VITE comprises a network of three interacting hypothesized  
639 neural populations, each coding a distinct quantity that is needed in the generation of the  
640 motor command, given some target position. These neural populations encode quantities  
641 related to the present position of the system, the desired target position, and the difference  
642 between the target and the present position. These interacting populations are configured  
643 in such a way that there are many structural similarities to the control architecture of TD.  
644 The result of these similarities is that the present position of a population will move in a way  
645 that is consistent with a 2<sup>nd</sup>-order dynamical system, much like Task Dynamics (as pointed  
646 out by, e.g., ([Beamish et al., 2006](#))).

647 One of the strengths of the model is accounting for coarticulatory effects. Coarticulation  
648 in this model is seen as arising from temporal overlap of independent and invariant articu-  
649 latory gestures – the so-called coproduction model of coarticulation ([Browman et al., 1992](#),  
650 [1995](#); [Fowler et al., 1993](#)). Other coarticulatory effects, such as clear vs. dark /l/ alterations,  
651 have been modeled at the planning level as changes in the temporal organization of gestures  
652 ([Browman et al., 1992](#), [1995](#); [Zsiga et al., 1994](#)).

653 Very early results from the Task Dynamics model showed that it was capable of repro-  
654 ducing the compensatory behavior seen in mechanical perturbation experiments, where a  
655 lowered jaw position during production of a bilabial stop is compensated for by a higher  
656 lower lip and lower upper lip (Saltzman *et al.*, 1986). However, the model is unable to  
657 account for auditory perturbations, as there is no auditory feedback channel.

658 Task Dynamics can produce simple speech-rate effects by changing the dynamical pa-  
659 rameters of the control law – e.g., by making the task-space motions more or less damped.  
660 In addition to these linear rate effects, the Task Dynamics model is able to produce a wide  
661 range of non-linear temporal effects seen in speech. Through the  $\pi$ -gesture model (Byrd  
662 *et al.*, 2003), the model is able to capture the non-linear slowing found adjacent to prosodic  
663 boundaries as well as capture many of the spatial effects, such as larger movements (Fougeron  
664 *et al.*, 1997), seen at those boundaries within a single framework. More recent work has ex-  
665 tended the model to account for syllable structure and prosodic prominence (Saltzman *et al.*,  
666 2008). While some recent work has started to explore neural mechanisms for some of the  
667 components of the model (Tilsen *et al.*, 2016), and a connection to the VITE neural model  
668 (Lammert *et al.*, 2018) has been established, the components of TD have not been explicitly  
669 related to specific neural structures.

### 670 C. State Feedback Control

671 The State Feedback Control for speech production (SFC) model is a speech-specific in-  
672 stantiation of the general Kalman filter-type architecture in Figure 5c (Houde and Chang,  
673 2015; Houde and Nagarajan, 2011). The primary focus of SFC has been to apply the in-

674 sights gained from state feedback approaches in other motor domains to speech. This type  
675 of model is used widely in current theories of motor control in non-speech domains (e.g.,  
676 work from [Diedrichsen \*et al.\* \(2010\)](#); [Scott \(2004\)](#); [Shadmehr and Krakauer \(2008\)](#); [Todorov  
677 \(2004\)](#); [Todorov and Jordan \(2002\)](#)), and is an evolution of a traditional feedback control  
678 system (Fig 4b). Recall that a primary challenge of feedback control is that sensory feed-  
679 back is typically noisy and delayed, making the instantaneous state of the plant impossible  
680 to know with perfect accuracy. By adopting a Kalman filter-type architecture (Fig 5c), SFC  
681 presents, in a speech motor control context, one method by which sensory feedback may be  
682 integrated with internal model predictions to produce improved estimates of the state of the  
683 plant.

684 In the SFC model (shown in Figure 8), estimation of the plant state is done by an *observer*  
685 (refer to Fig 5c). This observer receives a copy of the outgoing motor command issued by  
686 the control law (also known as the efference copy) <sup>4</sup>. Based on this signal, the observer  
687 predicts how the plant will move at the next time step ( $((\tilde{\mathbf{x}}, \tilde{\dot{\mathbf{x}}}))$ ) as well as the auditory and  
688 somatosensory feedback that will be received based on that predicted movement ( $((\tilde{\mathbf{y}}, \tilde{\dot{\mathbf{y}}}))$ ).  
689 The predicted sensory feedback is then compared with actual sensory feedback to calculate  
690 a sensory error ( $((\mathbf{e}_y, \dot{\mathbf{e}}_y))$ ). This error is then converted to a task state error (or task gain),  
691 via a gain function. Finally, the task state ( $((\hat{\mathbf{x}}, \hat{\dot{\mathbf{x}}}))$ ) is estimated using the predicted state as  
692 well as the weighted sensory errors for both auditory and somatosensory predictions. As the  
693 gains associated with the sensory errors are assigned to optimize the final estimation, the  
694 observer in SFC functions is a Kalman filter ([Todorov and Jordan, 2002](#)), which provides  
695 the optimal *a posteriori* estimate of the state, under the assumption of linear processes of

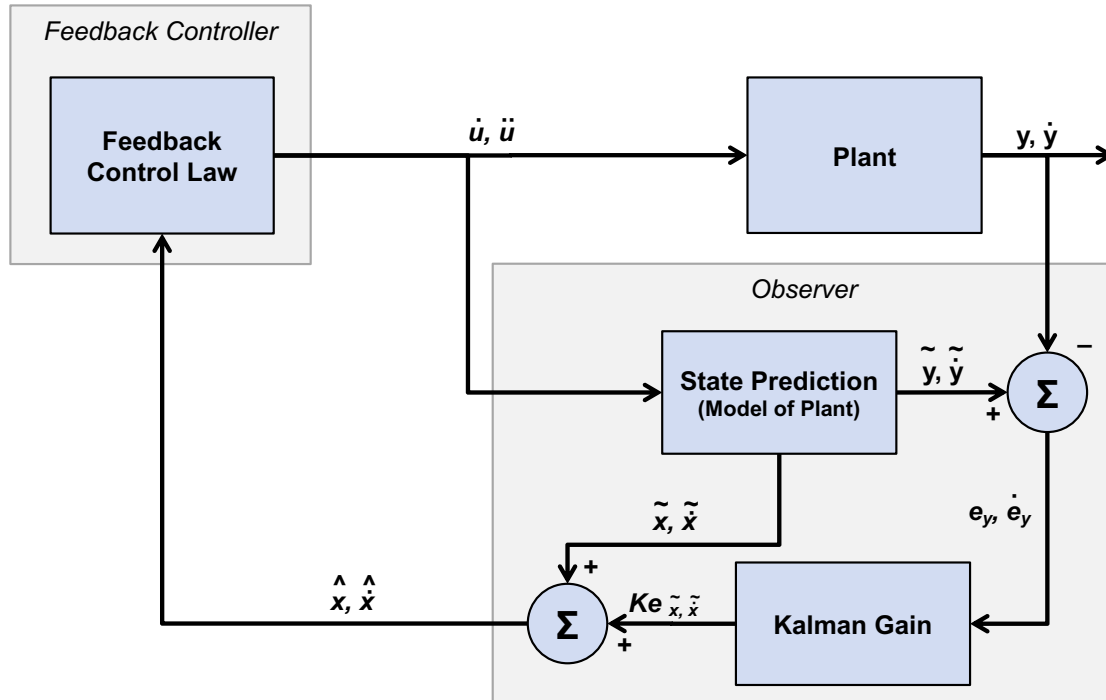

FIG. 8. Control architecture of the State Feedback Control (SFC) model. The final state estimate passed back to the controller as a feedback signal,  $(\hat{x}, \dot{\hat{x}})$ , is derived from a combination of a state prediction process and sensory processes. Comparing this diagram to Figure 5c, one can see that SFC is an integrated model predictive feedback control architecture.

696 prediction and sensory feedback. Note that the sensory feedback the observer receives at any  
 697 time point reflects the past state of the plant, while the state prediction reflects the current  
 698 state. This delay is accounted for by delaying the sensory prediction before computation of  
 699 sensory errors.

700 The model does not make explicit mention of a reference signal or a planner, and by  
 701 extension does not make explicit mention of any comparison between sensory feedback and  
 702 a reference. Providing a detailed description of the controller has not been a focus in  
 703 the development of SFC, and therefore the controller, as presented in the literature, is

704 represented by a generalized feedback control law which is a function  $U(\hat{\mathbf{x}}, \hat{\dot{\mathbf{x}}})$  of only the state  
705 estimate. This control law could take almost any form. However, the authors of this review  
706 expect any feedback control law that produces reasonable speech production behavior would  
707 need to be a function of some kind of reference, whether an explicitly planned trajectory or  
708 a gestural score. Indeed, specifying the details of this feedback control law in SFC, and the  
709 addition of a planner module, have been a primary motivation for the development of the  
710 FACTS model, described below.

711 By combining a state prediction with sensory feedback to estimate the current state, the  
712 SFC model is able to act quickly by operating principally on an internal prediction of the  
713 plant state. This also allows the system to operate in the absence of sensory feedback, either  
714 when that feedback is too delayed to be of use (as for very fast speech movements) or when  
715 sensory feedback is unavailable (as when speaking in loud noise or in cases of non-congenital  
716 deafness). Yet, the system is still able to respond when the internal predictions do not  
717 match the incoming sensory feedback (either due to errors in the prediction process or due  
718 to external perturbations of the plant). Thus, this system combines the major advantage of  
719 traditional feedback control systems (robustness to perturbations) with that of feedforward  
720 control (fast, accurate movement even in the absence of sensory feedback).

721 Note that, in SFC as currently implemented, there is no distinction between task space  
722 and mobility space; they are effectively collapsed into a single space, such that commands  
723 are issued in task space. This means that the current implementation of SFC is only able to  
724 model a system where the goals of speech production are the same as the mobility space of



725 the system. SFC has been implemented to control pitch, where the fundamental frequency  
726 of vocal fold vibration maps onto a one-dimensional mass-spring system.

727 This model has been shown to accurately reproduce the behavior patterns of human  
728 participants in pitch-alteration studies (Houde *et al.*, 2006). The model has also been shown  
729 to reproduce two neural effects seen in human speech: 1) the reduction seen in cortical  
730 electroencephalography (EEG) or magnetoencephalography (MEG) signals when speaking  
731 compared to listening to the one's own speech played back over headphones or speakers  
732 (speech induced suppression) and 2) the enhancement of the EEG /MEG signals when seen  
733 when one's speech is externally perturbed compared to when it is unperturbed (speech  
734 perturbation).

#### 735 D. FACTS

736 Recently, a new model – the Feedback Aware Control of Tasks in Speech (FACTS) model  
737 – has been proposed that combines aspects of both Task Dynamics and State Feedback  
738 Control (Parrell *et al.*, 2006). Building on TD and SFC, FACTS combines elements of feed-  
739 back control and model predictive control. FACTS is an attempt to combine the strengths  
740 of each model, while addressing the major shortcomings of each. Specifically, the Task  
741 Dynamics model includes a well-developed control law that relates the movements of the  
742 speech articulators to high-level tasks, but assumes perfect knowledge of the state of the  
743 vocal tract. Conversely, State Feedback Control focuses principally on how the state of the  
744 plant can be estimated from sensory information given the noise and time delays inherent  
745 in auditory and somatosensory perception, but has to date only been used to control a very

746 simplistic one-dimensional model of pitch. FACTS combines the concept of state prediction  
 747 and estimation from SFC with the planning model and vocal tract control of TD.

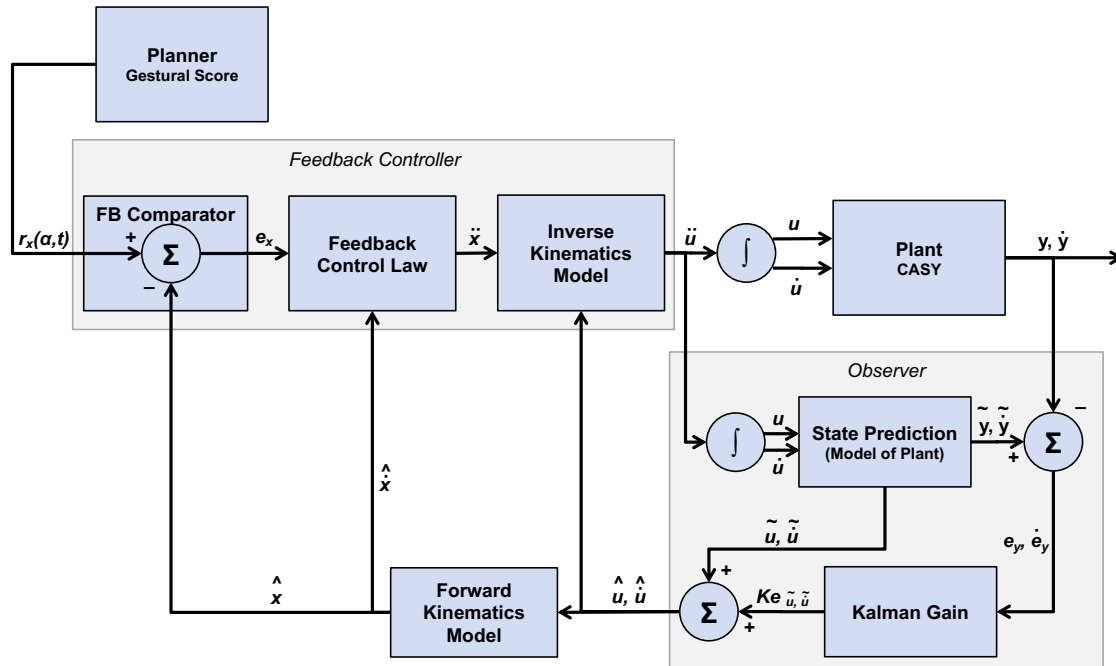

FIG. 9. Control architecture of the Feedback Aware Control of Tasks in Speech (FACTS) model.

FACTS builds upon the architecture of the Task Dynamics model by substituting an estimate of the mobility-space state for the true state through an observer module. The observer generates this mobility state estimate through a combination of an internal mobility state prediction and multisensory feedback. As such, FACTS is an implementation of an integrated model predictive controller, like SFC.

748 The architecture of FACTS is shown in Figure 9. The control component of the model is  
 749 the same as that for the Task Dynamic model, with a planner generating a gestural score,  
 750 which is passed to a feedback controller to generate changes at the task ( $\ddot{x}$ ) and mobility  
 751 ( $\ddot{u}$ ) levels. This final motor command,  $\ddot{u}$ , is passed to the plant to produce articulator

752 movements as in Task Dynamics. However, where Task Dynamics passes the current plant  
753 and tasks states directly back to the feedback controller, FACTS uses an observer to estimate  
754 the task and plant states, as in the earlier SFC model. The final motor command  $\tilde{\mathbf{u}}$  is passed  
755 to an internal model of the plant to generate predicted articulator positions  $((\tilde{\mathbf{u}}, \tilde{\dot{\mathbf{u}}}))$ , as well  
756 as auditory and somatosensory feedback  $((\tilde{\mathbf{y}}, \tilde{\dot{\mathbf{y}}}))$ . The estimated sensory feedback is then  
757 compared with sensory feedback from the plant to generate a sensory error  $((\mathbf{e}_y, \dot{\mathbf{e}}_y))$ . The  
758 estimated mobility state is generated from the predicted mobility state and the sensory  
759 error via an unscented Kalman filter, an extension of the linear Kalman filter to nonlinear  
760 systems (Wan and Van Der Merwe, 2001). The estimated mobility state is then converted to  
761 an estimated task state, needed by the feedback controller to generate the motor command  
762 at the next time point, via the same forward kinematics function as in Task Dynamics.

763 The FACTS model is relatively new, and so remains mostly untested. However, the model  
764 is able to qualitatively reproduce human responses to external perturbations, including full  
765 compensation for mechanical perturbations and partial compensation for auditory pertur-  
766 bations (Parrell *et al.*, 2006). This partial compensation is a function of both auditory and  
767 somatosensory acuity. One of the features of FACTS is that it builds on the successes of the  
768 Task Dynamics model. Since many of the mechanisms of the controller are shared between  
769 the two models, FACTS can reproduce the successes of the Task Dynamics model, including  
770 coarticulatory effects.

771 **E. ACT**

772 The primary focus in the the ACTion-based model of speech production, speech per-  
773 ception, and speech acquisition (ACT) model is the acquisition and development of speech  
774 motor control. Kröger *et al.* (2009) introduced ACT as a neurocomputational model that  
775 draws elements from both DIVA and Task Dynamics. The architecture of ACT, shown in  
776 Figure 10, is essentially a feedforward controller when viewed between the motor plan and  
777 the plant. DIVA-style dual auditory/somatosensory feedback pathways are also part of the  
778 model. However, those pathways feed indirectly to the planner, by way of high-level com-  
779 parisons against abstract phoneme templates. Within the present framework, information  
780 used to modify the motor plan is considered to be part of the planner, and is therefore out-  
781 side the scope of low-level control, as defined here. This pathway is indicated by an open,  
782 labelled arrow in Figure 10. The plant in ACT is a three-dimensional kinematic model with  
783 articulatory control parameters similar to the Maeda and CASY models (Birkholz *et al.*,  
784 2006).

785 The planner in the ACT model relates to both the speech sound map of DIVA and  
786 the gestural score in the Task Dynamics model. Like in DIVA, the basic unit of speech  
787 is assumed to be the syllable, and each syllable is represented by a model neuron in the  
788 phonemic map (cf. the speech sound map in DIVA). As in DIVA, these abstract syllable  
789 representations are linked to specific motor and sensory plans. This is accomplished in  
790 ACT through the phonetic map. Unlike in DIVA, where the motor plan is represented as  
791 a time-varying desired articulatory position signal, the motor plans in ACT are defined in

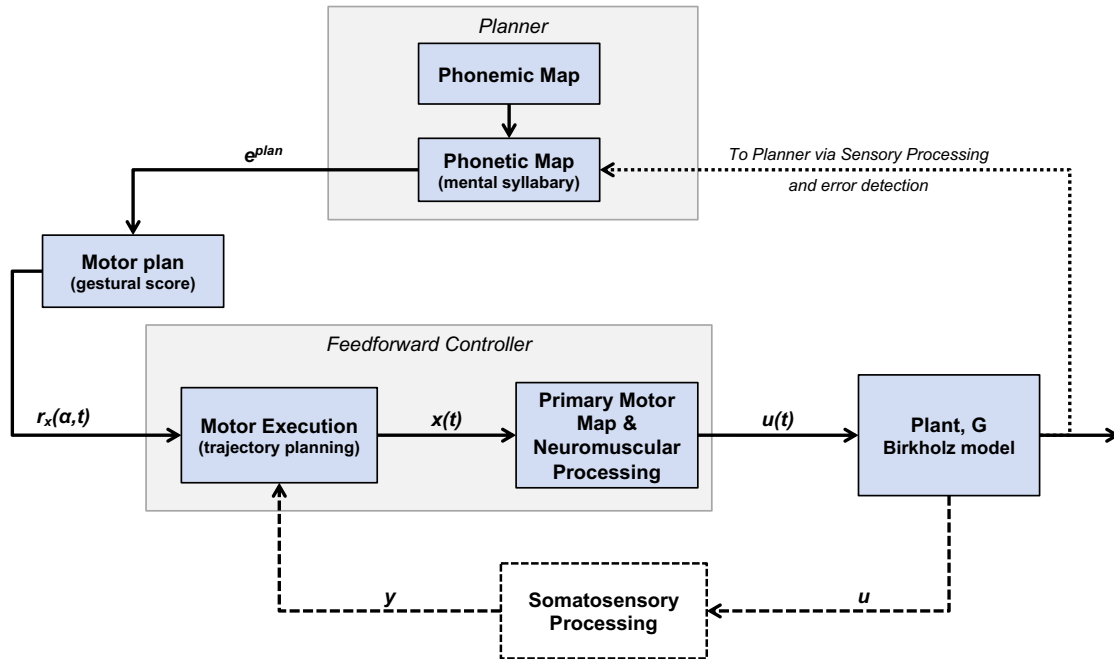

FIG. 10. Control architecture of the ACTION-based model of speech production, speech perception, and speech acquisition (ACT model). ACT draws from both DIVA and Task Dynamics for its architecture, with the model comprising both feedforward and feedback pathways (both somatosensory and auditory), but relying on point-attractor dynamics for its reference signal.

792 terms of high-level dynamic tasks (or gestures) as in Task Dynamics. Each motor plan is,  
 793 in effect, a gestural score, which defines the activation levels and temporal extent of each  
 794 speech gesture, with each speech gesture being defined as a dynamical point-attractor ( $\mathbf{r}_x$ ).

795 The phonetic map, in addition to linking the syllable to the motor plan, also links the  
 796 syllable to associated sensory (auditory and somatosensory) expectations. One conceptual  
 797 difference between ACT and DIVA is that DIVA views the sensory plans as the targets  
 798 of speech that have associated motor plans, while in ACT the targets are the high-level  
 799 task gestures with associated sensory expectations. This conceptual difference is reflected  
 800 principally in terms of how the models are trained (an issue not taken up within the scope

801 of the present review), but the basic architecture of the models is essentially the same: a  
802 high-level syllable activates a motor plan used for feedforward or model-predictive control  
803 and a sensory plan which can be compared against afferent sensory information.

804 The core control architecture in the ACT model borrows ideas from Task Dynamics, but  
805 is quite distinct. As discussed above, TD makes use of task-space comparisons between  
806 a reference, derived from the task-based gestural score, and the current (somatosensory)  
807 system state to control task-space movements given a control law that is consistent with  
808 damped oscillator dynamics. ACT, on the other hand, uses the reference, similarly derived,  
809 to directly drive motor action in a feedforward fashion. This is accomplished by the motor  
810 execution module, which uses the reference  $\mathbf{r}_x(\alpha, t)$  to generate a trajectory in task space  
811 ( $\mathbf{x}(t)$ ) that is consistent with damped oscillator dynamics. The task-space trajectory must  
812 be transformed into a mobility-space trajectory ( $\mathbf{u}(t)$ ) that can be used as a control signal  
813 to drive movements of the plant. This transformation is accomplished by the primary motor  
814 map. A subsequent neuromuscular processing step exists in the model, and is presently  
815 implemented as a direct, linear mapping. Plans exist for this component to eventually  
816 map control signals onto individual and/or combined muscle groups in a neuromuscular  
817 model. An additional pathway for somatosensory feedback processing is also planned. This  
818 is indicated by dashed lines in Figure 10. This feedback pathway, included in published  
819 figures representing ACT, would be used to “control motor execution”, presumably in a  
820 fashion similar to DIVA. This pathway has not yet been implemented, and the details of its  
821 properties have not been fully developed.

822 Like DIVA, the ACT model also has dual somatosensory and auditory feedback pathways.  
823 The principal way these feedback pathways are used in the model is to compare the current  
824 state of the plant against pre-learned templates representing the desired somatosensory and  
825 auditory states. A crucial difference between ACT and other models is that this error signal  
826 is used to influence the motor plan, rather than as part of the controller. That is, sensory  
827 feedback is used to detect sensory errors for updating the phonetic map to drive trial-to-trial  
828 adaption, a model of development and learning.

829 One difference between the ACT model and others is that the mappings that relate the dif-  
830 ferent signals (syllables $\mapsto\mathbf{r}_x$ , syllables $\mapsto\mathbf{r}_y$ ,  $\mathbf{r}_x\mapsto\mathbf{r}_u$ ,  $r_u\mapsto\dot{\mathbf{u}}$ , etc.) are implemented via tunable  
831 neural networks rather than as closed-form mathematical expressions. These networks are  
832 tuned during a learning phase. Some versions of DIVA presented in the literature, especially  
833 earlier in DIVA's development, had neural networks involved in these mechanisms (Guenther,  
834 1994). The use of trained neural network models for these transformations allows for flexi-  
835 bility in the form of the transformations. It opens the possibility that the transformations  
836 might take forms that deviate in unexpected, and potentially even biologically-plausible,  
837 ways when compared to mathematically-driven transformations typically adopted. The use  
838 of neural networks also makes it likely, however, that key transformations, such as the control  
839 law and the inverse kinematic transformations, cannot be easily written down analytically  
840 in closed form.

841 The ACT model is able to produce motor equivalence in articulators linked to the same  
842 gesture due to the use of high-level tasks rather than articulatory positions as the basic unit  
843 of the motor plan (Kröger *et al.*, 2009). The model is also capable of adaptive learning

844 based on high-level auditory errors or somatosensory perturbations, by changing the motor  
845 plan. However, the lack of feedback pathways in the controller means online compensation  
846 to these perturbations is not accounted for. The ACT model includes hypotheses about the  
847 neural structures that underlies the different components but to date has not been used to  
848 generate simulated neural activity to compare to neural data.

## 849 F. GEPPETO

850 The GEPPETO (GEstures shaped by the Physics and by a PErceptually oriented Targets  
851 Optimization) model (Patri *et al.*, 2015; Perrier *et al.*, 1996, 2005; ) is a model of speech  
852 control based on the equilibrium point hypothesis (Feldman, 1986). The primary focus of  
853 GEPPETO has been to investigate the hypotheses that 1) targets for speech production  
854 are discrete and phonemic, 2) biomechanics plays a non-trivial role in speech motor control,  
855 and 3) speech motor control employs optimal planning principles. In GEPPETO, as in the  
856 equilibrium point hypothesis, control occurs at the level of individual muscle lengths. Thus,  
857 the mobility space in GEPPETO is composed of lengths,  $u_k$ , of individual muscles  $k$ . The  
858 command generated by the central controller is a muscle length, or threshold, above which  
859 motor neurons will be recruited to contract the muscle. This threshold length is known as  
860 the equilibrium point or  $\lambda$ . Afferent feedback from the muscle about the current muscle  
861 length is compared against the current  $\lambda$ , and contractile force is generated if the muscle  
862 length is above the threshold. In GEPPETO, the activation ( $A$ ) of each muscle at time  
863  $t$  is based on both the current muscle length  $u$  and the current change in muscle length  
864  $\dot{u}$ :  $A_{(k,t)} = [u_k(t) - \lambda_k(t) + \gamma_k \dot{u}_k(t)]^+$ , where  $\gamma$  is a damping parameter that stabilizes the



865 system. Muscle activation is only generated when the muscle length is greater than  $\lambda$ :

866  $[A]^+ = \{A, \text{if } A \geq 0; 0, \text{otherwise}\}.$

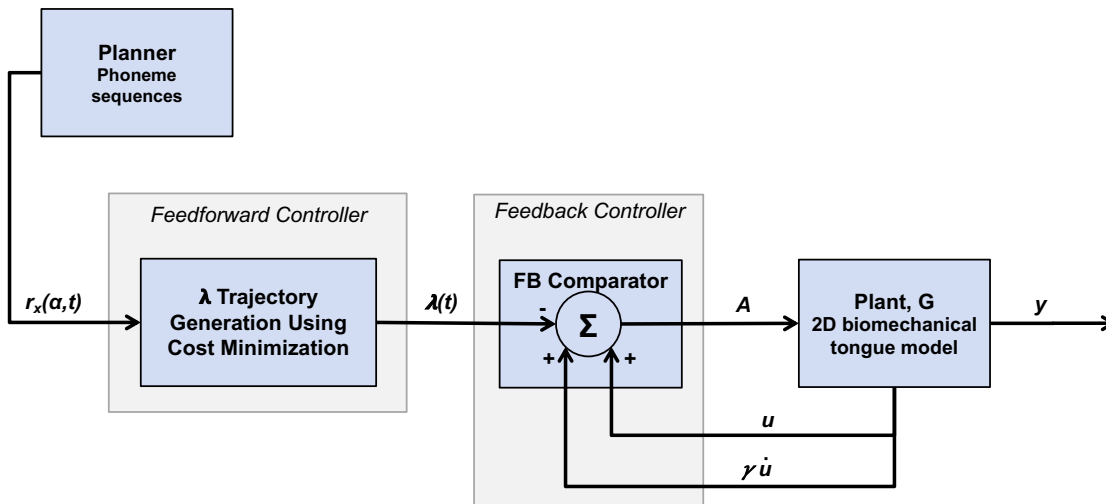

FIG. 11. Control architecture of the GEPPETO model. GEPPETO is based on the equilibrium point hypothesis, employing feedback control at the level of individual muscles, with relatively realistic biomechanics to move the speech articulators. Control is mediated by a feedforward process that transforms acoustic speech targets into equilibrium point values.

867 The muscle activation generated by the feedback controller then leads to the generation of  
 868 force ( $f$ ) in the individual muscles at the level of the plant:  $f_k(\lambda_k, t) = \rho_k[\exp(c_k A_k(\lambda_k, t) -$   
 869  $1)]$ , where  $\rho$  is a magnitude parameter related to the cross-sectional area of the muscle and  
 870  $c$  is a feedback gain. In this feedback control architecture, force can be generated either  
 871 by changes in the current  $\lambda$  or by changes in the length of the muscles. Importantly in  
 872 this approach, the ultimate position of the plant results from a combination of descending  
 873 control ( $\lambda$  values), plant biomechanics, and physical constraints.

874 The GEPPETO model, shown in Figure 11, combines the low-level feedback control  
875 structure of an equilibrium point model with a high-level feedforward controller that takes  
876 acoustic speech targets, defined as convex regions in acoustic (F1-F2-F3) space, as input and  
877 output  $\lambda$  values that are passed to the feedback controller. Thus, the task space for GEP-  
878 PETO is acoustic in nature (though see for a recent extension of the model to additionally  
879 include somatosensory targets). Critically, given the emphasis on the physics of the speech  
880 plant, GEPPETO uses a dynamical biomechanical model of the plant with control occur-  
881 ring at the level of muscles rather at the level of geometric model parameters/articulators  
882 as in the Maeda or CASY plant models. Most published papers on GEPPETO include only  
883 the tongue as a controllable articulator. It is modeled as a finite-element model with six  
884 muscles whose lengths can be independently controlled. The other vocal tract surfaces and  
885 articulators are fixed.

886 The output of the planner in GEPPETO is a series of  $n$  acoustic speech targets  
887  $(\phi^1, \dots, \phi^n)$ , each of which has an intended duration  $(T^1, \dots, T^n)$ . This duration can  
888 be affected by variables such as speech rate or stress. An additional constraint sets the  
889 amount of effort to be used for each speech target  $(w^1, \dots, w^n)$ , where effort is based on  
890 the amount of force that will be generated to produce that target across all the muscles of  
891 the plant, categorized into three levels:  $w \in \{\text{"weak"}, \text{"medium"}, \text{"strong"}\}$ .

892 This time series of targets  $\mathbf{r}_x(t) = \{(\phi^1, w^1, T^1), \dots, (\phi^n, w^n, T^n)\}$  is then passed to the  
893 feedforward controller to generate a time series of  $\lambda$  values for each of the six muscles in the  
894 plant,  $(\lambda_1(t), \dots, \lambda_6(t))$ . These  $\lambda$  trajectories are generated for each utterance using an op-  
895 timization procedure that minimizes displacements in mobility space (i.e. changes in muscle

896 lengths) while producing tongue movements that will achieve the required acoustic targets  
897 at the required time with the required amount of effort. In this optimization process, learned  
898 internal models are used to estimate the amount of force and acoustic signal generated for  
899 any given motor command.

900 GEPPETO shares certain characteristics with other models. First, speech goals are de-  
901 fined as regions in acoustic space (F1-F2-F3), as in DIVA. Second, feedback signals are  
902 never directly compared against the output of the planner, as in ACT. GEPPETO differs  
903 in key ways from other models, however. First, the speech targets in GEPPETO are hy-  
904 pothesized to be discrete in time, rather than time-varying regions as in DIVA. Second,  
905 the feedforward and feedback controllers in GEPPETO are arranged in a unique, serial or  
906 hierarchical arrangement, such that the output of the feedforward controller is used as the  
907 input to the lower-level feedback controller. Third, unlike the preplanned trajectories in  
908 DIVA, GEPPETO generates new movement plans for each utterance. Finally, it is notable  
909 that GEPPETO is unique in the fact that the plant's inputs are not given in mobility-space  
910 variables.

911 The largest success of the GEPPETO model has been to replicate many of the character-  
912 istic kinematic patterns of speech movements, including velocity profiles ([Payan \*et al.\*, 1997](#)),  
913 tongue loops in velar stops ([Perrier \*et al.\*, 2003](#)), and the relationship between velocity and  
914 movement curvature ([Perrier \*et al.\*, 2008](#)). This work shows that many of these phenomena  
915 need not be directly controlled, since in GEPPETO they are emergent properties of linear  
916 changes in  $\lambda$  values. One of the drawbacks of the optimization approach in GEPPETO is  
917 that it produces identical trajectories each time the same utterance is produced, unlike the

918 variability seen in natural speech. Recently, however, the GEPPETO model was expanded  
919 by implementing it in a probabilistic Bayesian framework (B-GEPPETO) that is able to ac-  
920 count for token-to-token variability (Patri *et al.*, 2015; ). This newer model also incorporates  
921 somatosensory phonemic targets in addition to auditory targets.

## 922 G. Other models

923 All the above models include, at a minimum, the ability to generate motor commands  
924 based on some motor plan. These motor commands are then used to move a vocal tract  
925 model of some kind. While such complete models are the primary focus of the current review,  
926 it is important to also mention more conceptual models which have not been implemented to  
927 the same degree. The Hierarchical State Feedback Control model (HSFC) (Hickok, 2012a·b·  
928 2014) is an attempt to combine speech motor and psycholinguistic approaches to speech pro-  
929 duction. It is a version of an integrated predictive/feedback controller, sharing some aspects  
930 with the State Feedback Control model of speech production (Houde and Nagarajan, 2011).  
931 Tian & Poeppel (Tian and Poeppel, 2010) propose a hybrid model predictive/feedback con-  
932 trol model of speech motor control. The overall architecture is also very similar to the State  
933 Feedback Control model (Houde and Nagarajan, 2011).

934 A few other models of speech motor control have been proposed that have focused primar-  
935 ily on the biomechanical properties of the plant rather than on the control architecture per  
936 se (Dang and Honda, 2002· 2004; Laboissiere *et al.*, 2018; Ostry *et al.*, 1996; Perrier *et al.*,  
937 1996; Sanguineti *et al.*, 1990). While these models do not relate control to linguistic speech  
938 targets (i.e. describe how or why certain muscle contraction patterns would be used), the

939 success of these models in recreating measured articulatory trajectories deserves mention in  
940 the context of the present review.

941 One class of these models (reviewed in [Sanguinetti \*et al.\* \(1998\)](#)), is based on the equilibrium  
942 point control. While this is the same general approach as taken by the GEPPETO model,  
943 the focus of this work differs. Rather than implementing control of the speech motor system  
944 in terms of higher-level linguistic or task-directed (auditory, articulatory) control, these  
945 models focus principally on how muscle forces are generated to move the speech articulators.  
946 Typically, the goal is to drive movements to match measured human speech kinematics.  
947 These models essentially implement a feedback controller, albeit one that functions entirely  
948 at the level of the plant without any distinction between task and mobility space. A separate  
949 set of biomechanical models assumes that muscle activations are the output of the controller,  
950 rather than equilibrium points ([Dang and Honda, 2002; 2004](#)). This is a purely feedforward  
951 control architecture.

952 Both the equilibrium point models ([Sanguinetti \*et al.\*, 1998](#)) as well as the direct activation  
953 models ([Dang and Honda, 2004](#)) have been shown to fit articulatory data well using similar  
954 biomechanical models. Interestingly, results from both models suggest that motor commands  
955 to certain muscles (or muscle groups) will drive the speech articulators towards a similar  
956 location regardless of their initial position. This suggests that speech motor control may  
957 be simplified by the use of muscle synergies that will drive the system to a target spatial  
958 configuration without the need for complex inverse dynamics models that calculate the  
959 precise muscle activations needed for each individual movement.

960 One important thing to note is that, because they focus on the generation of muscle forces  
961 given some given motor commands, this class of models is generally complementary to and  
962 compatible with control models that output motor commands as articulatory positions, and  
963 ignore the generation of muscle activations (such as DIVA, TD, ACT, and FACTS). With  
964 some modifications, the output of these models could serve as the input to an equilibrium  
965 point model or the Dang & Honda model. In fact, equilibrium point control has been  
966 implemented within the DIVA architecture (Zandipour *et al.*, 2004).

#### 967 **IV. DISCUSSION**

968 The primary goal of the current paper has been to clearly lay out the architectures of a  
969 crucial component of existing speech motor control models: the control layer (see Figure 1),  
970 that attempts to produce accurate tracking of speech articulation kinematics given a motor  
971 plan. Common terminology and basic principles of motor control were used to describe each  
972 model, to understand the commonalities between these models, as well as how they differ.  
973 It was shown that these models can be cast as special cases of generalized feedforward (Fig  
974 4a), feedback (Fig 4b), and model predictive (Fig 4c) controllers. The models discussed  
975 here differ in which of these components are used (e.g., some are lacking either feedforward  
976 or feedback elements of control), and in the detailed implementation of these mechanisms.  
977 These differences are summarized in Table I. Speech production is, however, a complex  
978 process with many additional and important considerations, including higher-level motor  
979 planning, linguistic, communicative and even social considerations, as well as learning and  
980 developmental aspects, all of which contribute to the wide variety of speaking styles observed

|                                      | DIVA                                          | TD                                          | SFC                                        | FACTS                                       | ACT                                  | GEPPETO                               |
|--------------------------------------|-----------------------------------------------|---------------------------------------------|--------------------------------------------|---------------------------------------------|--------------------------------------|---------------------------------------|
| Feedback Pathway                     | Y                                             | Y*                                          | Y                                          | Y                                           | Y                                    | Y                                     |
| Feedforward Pathway                  | N                                             | N                                           | N                                          | N                                           | Y                                    | Y                                     |
| Internal Prediction/State Estimation | Y                                             | N                                           | Y                                          | Y                                           | N                                    | N                                     |
| Principal Reference                  | <a href="#">Tourville and Guenther (2011)</a> | <a href="#">Saltzman and Munhall (1989)</a> | <a href="#">Houde and Nagarajan (2011)</a> | <a href="#">Ramanarayanan et al. (2016)</a> | <a href="#">Kröger et al. (2009)</a> | <a href="#">Perrier et al. (2005)</a> |

TABLE I. *Summary of which aspects of motor control modeling are present in each model.*

981 in real human speech. These aspects are beyond the scope of the present paper, but would  
982 make an interesting subject future reviews.

983 There are clear differences among models in terms of how their final execution of speech  
984 motor control is influenced by feedback signals originating from the plant. ACT, for instance,  
985 incorporates no explicit feedback into its control mechanisms. SFC implements proportional  
986 control, meaning that the motor commands are linearly proportional to the feedback error.  
987 DIVA's also implements proportional control which, for its hybrid architecture means that  
988 motor commands are linearly proportional to both the error (in the feedback pathway) and  
989 the reference (in the feedforward pathway) signals. The simplicity of these designs relative  
990 to common engineering approaches is notable. As mentioned above, and by way of example,  
991 engineering control systems often take information about the integral or derivative of the  
992 error signal into account in order to provide quicker convergence to the target and to deal  
993 with persistent errors, respectively. TD – as well as FACTS, by way of adopting key control  
994 elements from TD – provides slightly more complexity through a form of PD control, albeit  
995 not strictly in the traditional engineering sense of PD control.

996 A related distinction between the models under consideration is how they function in the  
997 absence of feedback. TD, for instance, is solely a feedback architecture, and cannot function

998 in the absence of feedback signals. Similarly, GEPPETO would not be able to function in  
999 the absence of proprioceptive feedback about muscle length. Other models could continue  
1000 to function without feedback. DIVA is a hybrid feedback/model predictive architecture that  
1001 could rely exclusively on its model predictive mechanisms to generate motor commands in  
1002 the absence of explicit feedback. With the presence of feedback signals, SFC and FACTS  
1003 can utilize that feedback to produce optimal or near-optimal state estimates (under certain  
1004 strong assumptions, such as linearity of the plant ([Kalman \*et al.\*, 1960](#))), but in the absence  
1005 of feedback can still rely on the internal state prediction component of their broader state  
1006 estimation process to continue functioning through model predictive control. ACT is a  
1007 purely feedforward architecture that can function as designed in the absence of sensory  
1008 feedback. However, this also means that it is not sensitive to sensory feedback, unlike the  
1009 human speech motor control system.

1010 Among models that incorporate feedback, one of the most basic differences is whether  
1011 certain feedback signals are treated as idealized signals that are directly and instantaneously  
1012 observable, or whether they are treated as true sensory signals that may be potentially  
1013 noisy/delayed, subject to conditioning by internal models and that correspond with known  
1014 neurological signals. While it seems intuitively correct that any model of biological motor  
1015 control should focus on the latter, the former has been sometimes intentionally chosen  
1016 in specific aspects of the models, in the interest of focusing on other aspects of control.  
1017 TD provides only an idealized view of feedback concerning the positions and velocities of  
1018 articulators that does not model the sensory processes in any meaningful way. DIVA, TD  
1019 and FACTS also make simplifying assumptions about the somatosensory feedback signal,



1020 which is assumed to be more or less equivalent to the plant's mobility variables. DIVA's  
1021 auditory and somatosensory feedback are slightly less idealized in that they correspond  
1022 to known, independent neurological pathways and can incorporate delays associated with  
1023 sensory transduction and processing. SFC and FACTS begin with the assumption that  
1024 sensory feedback will be noisy and/or inaccurate, and use that assumption to motivate the  
1025 well-elaborated integration of sensory feedback with internal model predictions to provide  
1026 more accurate estimates of the state of the plant. GEPPETO provides perhaps the most  
1027 realistic implementation of somatosensory feedback given that the feedback in the model  
1028 (muscle length and change in muscle length) corresponds to well-known afferent signals  
1029 from muscle spindles. However, no current models seriously attempt to model the sensory  
1030 system itself – they take it as given that critical information (e.g., formants, articulatory  
1031 positions) can be extracted from the raw sensory input.

1032 Most models are purely kinematic in how they approach control, in that motor commands  
1033 are stated in kinematic terms (i.e., as state configurations, and not as forces) and do not  
1034 account for dynamical considerations related to the effects of inertia, centrifugal and cen-  
1035 tripetal forces, and the effects of gravity. Control systems that are strictly linear, rigid and  
1036 slow-moving, highly damped, or that have specialized designs can sometimes operate purely  
1037 kinematically. It seems likely, however, given existing literature (e.g., [Derrick \*et al.\* \(2015\)](#);  
1038 [Ostry \*et al.\* \(1996\)](#)) that such considerations may be non-negligible for speech production  
1039 in the biological case. A kinematic approach can be, in the opinion of the authors, partially  
1040 attributed to models of the plant used in most speech motor control models, which are nearly  
1041 all kinematic in nature. It is worth noting that other plant models are attempting to provide

1042 enhanced biomechanics ([Derrick \*et al.\*, 2015](#); [Gick \*et al.\*, 2011](#); [Lloyd \*et al.\*, 2012](#)) as well,  
1043 even if a full review of biomechanical vocal tract models is beyond the scope of the present  
1044 review. GEPPETO represents a notable effort to move beyond kinematic treatment of con-  
1045 trol, and of the plant, by incorporating a mobility space that represents muscle lengths, as  
1046 well as motor commands that represent muscle activations that are used to generate muscle  
1047 forces in a relatively realistic biomechanical model of the tongue.

1048 All architectures rely on a motor plan of some kind – whether an explicitly planned  
1049 trajectory or a gestural score – that is formed at a higher level of motor processing, and  
1050 which is issued to the controller in order to be carried out. SFC is a partial exception to this  
1051 general statement in that, as mentioned above, that model does not explicitly mention the  
1052 incorporation of a plan, even though the generalized structure of its controller would be able  
1053 to incorporate a planning module if more detailed specification required it (a specification  
1054 which FACTS has subsequently elaborated upon). Models of speech motor planning have  
1055 been discussed and elaborated upon in the literature ([Bohland \*et al.\*, 2010](#); [Byrd \*et al.\*,  
1056 2009](#); [Civier \*et al.\*, 2013](#); [Saltzman \*et al.\*, 2008](#)), and display a surprising amount of variety.  
1057 Although the planning level is beyond the scope of this paper, it is worth noting the variety  
1058 of planning mechanisms that have been proposed in order to help narrow some of the longest-  
1059 standing debates concerning speech motor control. In particular, drawing a clear distinction  
1060 between control architectures and planning mechanisms, as this review has attempted to do,  
1061 makes it apparent that much of the debate over the quality of competing models of speech  
1062 production would appear to be concentrated at the planning level, and not at the level of  
1063 control. For instance, issues surrounding the nature of production goals (e.g., acoustic vs.

1064 articulatory) and the composition of those goals into utterance-size units would primarily  
1065 be a concern of the planning level. Any role for muscle synergies ([Ramanarayanan \*et al.\*,](#)  
1066 [2014](#)) and motor primitives would be most naturally incorporated into the planning level,  
1067 and not the level discussed in this review. The nature of speech production goals has been  
1068 the subject of particularly strong debate for decades, and is reflected in the nature of the  
1069 feedback and reference signals in the models, which may be auditory and/or somatosensory,  
1070 as in DIVA and SFC, or articulatory, as in Task Dynamics. Interestingly, the nature of the  
1071 feedback signals would appear to have little bearing on the specific architectural choices of  
1072 the models – the architectures being general enough to handle a range of signals without  
1073 substantial changes to their configuration.

1074 The parameters that determine the overall characteristics of control are time-invariant  
1075 in most current models, thereby limiting the models in their ability to capture specific  
1076 aspects of behavior that require those parameters to change over time. Models may struggle,  
1077 for instance, to account for interspeaker differences, or long-term changes in speech motor  
1078 control that occur during development and aging, that could be modeled by adjustments  
1079 to control parameters. Controllers that adapt their parameters over time are the subject of  
1080 adaptive control ([Åström and Wittenmark, 2013](#)). This well-studied branch of control theory  
1081 may provide a foundation for models of speech production to incorporate such parameter  
1082 adjustments as a way to represent the mechanisms of differences or changes mentioned above.  
1083 A full treatment of adaptive control is outside the defined scope of the present paper, as  
1084 are issues surrounding speech development. Nonetheless, it should be noted that inroads  
1085 into adaptive control have been made by some of the models discussed here. ACT allows

1086 for motor planning to be adapted based on sensory feedback errors. DIVA, too, adapts  
1087 planned trajectories based on the feedback controller output. This adaptation is of primary  
1088 importance during development, but can lead to changes at any time.

1089 Shorter time-scale cognitive and physiological factors – for instance, due to attention,  
1090 fatigue and motivation – as well as stochastic variability (Munhall *et al.*, 1994; Saltzman  
1091 *et al.*, 1995; Tilsen, 2017) may also most naturally be handled through adjustments to  
1092 control-level parameters. Efforts have been made to model learning and adaptation at  
1093 the planning level (e.g., GODIVA). However, the value of the proportional gain in DIVA’s  
1094 controller, as well as the weights assigned to the feedback and model predictive pathways  
1095 in their contribution to the motor command, are assumed to be fixed in fully adult speech.  
1096 Similarly, the damping and stiffness parameters of the controller in TD are fixed in value. A  
1097 notable counterexample to this generalization comes from Kalman filter-based architectures,  
1098 such as SFC and FACTS, which change the weight assigned to sensory feedback and internal  
1099 model predictions, toward combining them into a single state estimate, based on the degree of  
1100 statistical reliability of those two pathways. Such adaptation may be useful in modeling the  
1101 impact of sensory feedback impairment on speech motor control. Another notable example  
1102 of this type is DIVA’s GO signal, which can be adjusted by higher-level processes in order  
1103 to control the initiation of movement and overall speaking rate.

1104 A clear understanding of how the various models are structured can aid in clearly defining  
1105 theoretical questions of interest. For instance, the many similarities of the models discussed  
1106 in this review naturally raise questions about what is gained by allowing the remaining  
1107 model dissimilarities to persist, and whether the models can converge to a single, unified

1108 model of the control layer in speech motor control. There is no mathematical reason why the  
1109 feedforward/feedback pathways embodied by DIVA couldn't be combined with the forward  
1110 dynamic control of TD, as well as the feedback/internal model-based state estimation in  
1111 SFC. Indeed, FACTS, as a combination of complementary elements of TD and SFC, has  
1112 already taken a step toward beginning these potentially useful combinations. Whether  
1113 such a unification is sensible from a theoretical point of view, and precisely what form  
1114 that unification might take, can be stated very precisely in mathematical terms using the  
1115 model architectures. In general, models can help in defining and circumscribing the space  
1116 of possible architectures and solutions to a specified biological control problem ([Schaal and](#)  
1117 [Schweighofer, 2005](#)).

1118 A related, empirical question is whether a model unification is useful for explaining ob-  
1119 servations from human speech data. Among the many benefits of developing formal models  
1120 of speech motor control is that models can be used to make specific, quantitative predictions  
1121 about human speech behavior that are testable in light of data. The predictive capabilities  
1122 of formal models can also guide the design of new experiments to test specific aspects of  
1123 theory and modeling, inspired by the behavioral predictions of the model, and perhaps pi-  
1124 loted *in silico*. Empirical questions regarding the models need not be limited to observable  
1125 behaviors, either. Models can also facilitate clearer connections to be drawn between specific  
1126 model mechanisms and their observed neurological counterparts, either through structural or  
1127 functional neuro-imaging. The connection between engineering and biological mechanisms  
1128 has been well developed in several domains of motor control, including speech motor control

1129 (Guenther *et al.*, 1998) and oculomotor control (Lisberger, 1988; Robinson, 1981; Shibata  
1130 and Schaal, 2001).

1131 The utility of speech motor control models additionally extends beyonds clarifying and  
1132 formalizing our understanding of speech motor control itself. Models can also be useful for  
1133 practical applications in speech synthesis. Control models, coupled with faithful mechanical  
1134 models of the vocal tract, hold promise for applications in flexible and expressive speech  
1135 synthesis. This kind of synthesis is typically called *articulatory synthesis*. Shadle and  
1136 Damper (2002) outlined several complementary advantages that articulatory synthesizers  
1137 should have over now widely adopted data-driven approaches like concatenative synthesis  
1138 (Black, 2002) and Hidden Markov Model-based synthesis (Schroeter, 2006). Among these  
1139 advantages are (a) the promise of producing speech associated with extraordinary speakers  
1140 (e.g., an exceptional opera singer) or hypothetical speakers, from whom data can be difficult  
1141 or impossible to collect, (b) the promise of changing the quality or type of speaker without  
1142 having to perform additional statistical training of the synthesizer, (c) the promise of having  
1143 meaningful parameters that can be helpful in fixing or adjusting the synthesizer output, in  
1144 addition to providing insights into human speech production.

1145 The models discussed here, in addition to being formal and mechanistic, are also causal,  
1146 by intention of their development and by virtue of their historical context. Causal mod-  
1147 els can, as such, serve to encapsulate current theoretical understanding of the mechanisms  
1148 underlying speech motor control into a compact and rigorous form. Analysis of speech be-  
1149 havior, even in response to challenging or contrived situations, may not always be sufficient  
1150 for inferring the causal mechanisms of those behaviors. An individual's sensorimotor behav-

1151 ior is, in general, the result of a complex mixture of stable and mature control mechanisms,  
1152 learned and adaptive strategies, and possible individual-specific speaking strategies and im-  
1153 pairments. Therefore, inferring the underlying mechanisms that contribute to observed  
1154 behaviors is exceedingly difficult without an underlying framework. Neurologically relevant,  
1155 mechanistic models of sensorimotor control provide a neurocomputational substrate which  
1156 can aid in establishing causal relationships among the many component pathways and model  
1157 parameters. By modeling and resynthesizing human behaviors, mechanistic models can infer  
1158 the mechanisms underlying observed responses, including both impairment mechanisms and  
1159 neural adaptation to those impairments. This process is termed *system identification* in an  
1160 engineering context, and recent advances in methods for system identification have facili-  
1161 tated application to biological multivariate, closed-loop control systems (Engelhart *et al.*,  
1162 2016) and human sensorimotor control systems (Boonstra *et al.*, 2013; Engelhart *et al.*,  
1163 2015). Inroads have also recently been made in applying similar approaches in the domain  
1164 of typical (Mitra *et al.*, 2010) and pathological (Ciccarelli *et al.*, 2016) speech motor control.

## 1165 V. CONCLUSION

1166 In scanning the published literature on formal models of speech motor control, it is  
1167 perhaps understandable to be left with the impression that a dizzying variety of qualitatively  
1168 distinct models have been presented. Among all the models, DIVA and TD stand out as  
1169 having a relatively long history of representation in the literature, and the efforts to develop  
1170 them have remained almost entirely separate. SFC and FACTS make clear and related  
1171 modeling contributions that enable the expressive power to explain specific empirical results

1172 in speech production. ACT is inspired by both DIVA and TD, but has a structure all  
1173 its own. GEPPETO is the result of yet another distinct effort at model development; it  
1174 is concerned with biomechanical considerations in the plant. Clearly, there is a healthy  
1175 amount of variety in the various model architectures, especially in their specific use and  
1176 method of combining the three essential functional components: feedforward, feedback and  
1177 model predictive. However, it is nonetheless possible to view these models as belonging to a  
1178 single, coherent framework. The present paper has attempted to cut through the difficulties  
1179 associated with varying presentation and terminology, and to directly compare the models  
1180 against the backdrop of such a framework. By presenting a clear comparison of the points  
1181 of agreement and disagreement among the various models, as well as establishing areas  
1182 where all models can be improved, this work can provide a foundation for future model  
1183 development to improve our understanding of the speech motor system.

## 1184 **RESOURCES**

1185 Several of the models discussed in this paper (DIVA, TD, CASY and the Maeda model)  
1186 have been implemented as software tools, and are available for download online. Their  
1187 addresses on the World Wide Web are included in the references below.

## 1188 **ACKNOWLEDGMENTS**

1189 This work is sponsored by the Assistant Secretary of Defense for Research & Engineering  
1190 (ASD[R&E]) under Air Force contract #FA8721-05-C-0002. The authors would like to  
1191 thank Frank Guenther, Satrajit Ghosh and Bernd Kröger for their time and assistance in



1192 understanding the details of their models, as well as the three thoughtful reviewers of the  
1193 manuscript.

## 1194 **Appendix A**

1195 To aid the speech motor control practitioner, this Appendix consolidates the key algo-  
1196 rithmic steps of three control architectures: Task Dynamics (TD), Directions into Velocities  
1197 of Articulators (DIVA), and State Feedback Control (SFC). Bold lower case letters represent  
1198 vectors, and bold upper case letters represent matrices. A single overhead dot represents a  
1199 time derivative, and a double dot represents a second order time derivative.

### 1200 **1. Directions Into Velocities of Articulators (DIVA)**

1201 The Directions Into Velocities of Articulators (DIVA) model is a control architecture  
1202 developed by (Guenther *et al.*, 2006) that uses a hybrid of feedback control and model  
1203 predictive control. The model has been realized in software, and is available online (Nieto-  
1204 Castanon, 2016).

#### 1205 ***a. Algorithm***

1206 In the DIVA model predictive controller, the mobility space,  $\mathbf{u}$ , and state of the plant,  $\mathbf{x}$ ,  
1207 are identical, so  $\mathbf{u} = \mathbf{x}$ . Table II describes the variables in DIVA.

1208 1. Compute a model-predictive control signal (termed *feedforward* in the published liter-  
1209 ature on DIVA).

- 1210 (a) Compute an error using the reference target in mobility space and the current  
 1211 predicted state of the plant.

$$\mathbf{e}_u = \mathbf{r}_u(\mathbf{t}) - \tilde{\mathbf{u}} \quad (1)$$

- 1212 (b) Compute a feedforward control update by scaling the error signal.

$$\dot{\mathbf{u}}_{mp} = g_{mp} G \mathbf{e}_u \quad (2)$$

2. Compute a feedback-driven control signal using the reference target and the sensed plant output to compute an error in task space. Then, use a pseudoinverse Jacobian to convert the error from task space to mobility space. Do this in both the auditory and somatosensory feedback pathways.

$$\mathbf{e}_{aud} = \mathbf{r}_{aud}(t) - \mathbf{y}_{aud} \quad (3)$$

$$\dot{\mathbf{u}}_{aud} = g_{aud} \mathbf{J}(\mathbf{u})^{-1} \mathbf{e}_{aud} \quad (4)$$

$$\mathbf{e}_{somat} = \mathbf{r}_{somat}(t) - \mathbf{y}_{somat} \quad (5)$$

$$\dot{\mathbf{u}}_{somat} = g_{somat} \mathbf{J}(\mathbf{u})^{-1} \mathbf{e}_{somat} \quad (6)$$

3. Combine the feedforward and feedback control updates to determine the new plant state.

$$\mathbf{u} = \int (\dot{\mathbf{u}}_{mp} + \dot{\mathbf{u}}_{aud} + \dot{\mathbf{u}}_{somat}) dt \quad (7)$$

$$\tilde{\mathbf{u}} = \mathbf{u} \quad (8)$$

TABLE II. DIVA variables.

| Variable                                           | Description                                                                                                                                                                                    |
|----------------------------------------------------|------------------------------------------------------------------------------------------------------------------------------------------------------------------------------------------------|
| $\mathbf{e}_u$                                     | Error between reference target in mobility space and last command issued to the plant                                                                                                          |
| $\mathbf{e}_{aud}, \mathbf{e}_{somat}$             | Error between the reference target in task space and sensed task space output                                                                                                                  |
| $\mathbf{r}_u(t)$                                  | Reference target in mobility space. Defined at each point in time as a region with a center and bounds of acceptable performance.                                                              |
| $\mathbf{r}_{aud}(t), \mathbf{r}_{somat}(t)$       | Reference target in task space. Defined at each point in time as a region with a center and bounds of acceptable performance.                                                                  |
| $\dot{\mathbf{u}}_{aud}, \dot{\mathbf{u}}_{somat}$ | Change in mobility space position based on error in task space. A task space velocity update.                                                                                                  |
| $\dot{\mathbf{u}}_{ff}$                            | Change in mobility space position based on error in mobility space. A task space velocity update.                                                                                              |
| $\mathbf{u}$                                       | Mobility space position. Computed by integrating the feedforward and feedback mobility space velocities.                                                                                       |
| $\mathbf{y}_{aud}, \mathbf{y}_{somat}$             | Task space output                                                                                                                                                                              |
| $g_{ff}$                                           | Gain applied to feedforward velocity update                                                                                                                                                    |
| $g_{aud}, g_{somat}$                               | Gain applied to feedback velocity update                                                                                                                                                       |
| $G$                                                | Gain with a value between 0 and 1 that constrains velocities in mobility space from 0 to their maximum.                                                                                        |
| $\mathbf{J}(\mathbf{u})^{-1}$                      | Pseudoinverse of the Jacobian. The pseudoinverse converts errors in task space to changes in velocity in mobility space. The pseudoinverse can be computed as the Moore-Penrose pseudoinverse. |

## 1213 2. Task Dynamics

1214 Task Dynamics is a feedback control architecture developed by (Saltzman and Kelso,  
1215 1987; Saltzman and Munhall, 1989). The architecture has been realized in software in the  
1216 Task Dynamics Application (TADA) (Nam *et al.*, 2006) and available online (Nam, 2012).

1217 **a. Algorithm**

1218 The Task Dynamics algorithm is described below, and all variables are defined in Table

1219 **III.**

1220 1. Compute error in task space. In Task Dynamics, the task space,  $\mathbf{y}$ , and the state,  $\mathbf{x}$ ,  
1221 are identical, so  $\mathbf{y} = \mathbf{x}$ , and the error is

$$\mathbf{e}_x = \mathbf{r}_x(\alpha, \mathbf{t}) - \mathbf{x}. \quad (9)$$

1222 2. Use a dynamical system description of the controller, a second order ordinary differ-  
1223 ential equation, to compute the new acceleration state of the plant in task space as

1224

$$\ddot{\mathbf{x}} = -\mathbf{M}^{-1}\mathbf{B}\dot{\mathbf{x}} - \mathbf{M}^{-1}\mathbf{K}\mathbf{e}_x. \quad (10)$$

1225 3. Use a pseudoinverse Jacobian to convert the task space acceleration to mobility space  
1226 acceleration by

$$\ddot{\mathbf{u}} = \mathbf{J}^{-1}(\mathbf{u}) \left[ \ddot{\mathbf{x}} - \dot{\mathbf{J}}(\mathbf{u}, \dot{\mathbf{u}})(\mathbf{u}) \right]. \quad (11)$$

4. Integrate mobility space acceleration to get velocity and position in mobility space, so

$$\dot{\mathbf{u}} = \int \ddot{\mathbf{u}} dt \quad (12)$$

$$\mathbf{u} = \iint \ddot{\mathbf{u}} dt \quad (13)$$

1227 **3. State Feedback Control**

1228 The State Feedback Control is a hybrid feedback/model-predictive control architecture  
1229 proposed by (Houde and Nagarajan, 2011). Note that the notation used here follows the

TABLE III. Task dynamic variables.

| Variable                                          | Description                                                                                                                                                         |
|---------------------------------------------------|---------------------------------------------------------------------------------------------------------------------------------------------------------------------|
| $\mathbf{x}, \dot{\mathbf{x}}, \ddot{\mathbf{x}}$ | Task space position, velocity, and acceleration, $m$ by 1 vectors                                                                                                   |
| $\mathbf{u}, \dot{\mathbf{u}}, \ddot{\mathbf{u}}$ | Mobility space position, velocity, and acceleration, $n$ by 1 vectors                                                                                               |
| $\mathbf{r}_x(\alpha)$                            | Reference target in task space, $m$ by 1 vector                                                                                                                     |
| $\mathbf{M}$                                      | Inertial coefficients, $m$ by $m$ diagonal matrix                                                                                                                   |
| $\mathbf{B}$                                      | Damping coefficients, $m$ by $m$ diagonal matrix                                                                                                                    |
| $\mathbf{J}$                                      | Jacobian transformation from mobility space to task space. An $m$ by $n$ matrix with elements $J_{ij} = \frac{\partial x_i}{\partial u_j}$                          |
| $\mathbf{J}^{-1}$                                 | The (pseudo) inverse of the Jacobian. The Moore-Penrose pseudoinverse may be used, or other constraints can be applied to allow inversion of a non-square Jacobian. |
| $\dot{\mathbf{J}}$                                | The time derivative of each element of the Jacobian.                                                                                                                |

1230 originally-published notation, and differs slightly from the simplified notation used in the  
 1231 main body of the present paper.

1232 *a. Algorithm*

1233 1. Create a control update using the current estimate of the plant state by

$$\mathbf{u}_{t-1} = U_t(\hat{\mathbf{x}}_{t-1}). \quad (14)$$

1234 2. Create the new, true plant state using the true plant dynamics,  $G_{dyn}$ , by

$$\mathbf{x}_t = G_{dyn}(\mathbf{u}_{t-1}, \mathbf{x}_{t-1}). \quad (15)$$

- 1235 3. Create a new, predicted estimate of the plant state using the previous estimate of  
 1236 the plant state,  $\hat{\mathbf{x}}_{t-1}$ , the previous control signal,  $\mathbf{u}_{t-1}$ , and an estimate of the plant  
 1237 dynamics,  $\hat{G}_{dyn}$ , by

$$\tilde{\mathbf{x}}_{t|t-1} = \hat{G}_{dyn}(\mathbf{u}_{t-1}, \hat{\mathbf{x}}_{t-1}). \quad (16)$$

1238 X

- 1239 4. Generate the subsequent plant output using the true plant transformation from plant  
 1240 state to plant output by

$$\mathbf{y}_t = G_{out}(\mathbf{x}_t). \quad (17)$$

5. Create a correction term to the plant state estimate using the sensed feedback from  
 the true plant by

$$\mathbf{y}_{t-N} = G_{out}(\mathbf{x}_{t-N}) \quad (18)$$

$$\tilde{\mathbf{y}}_{t-\hat{N}} = \hat{G}_{out}(\mathbf{u}_{t-1}, \hat{\mathbf{x}}_{(t|t-1)-\hat{N}}) \quad (19)$$

$$\mathbf{e}_{\mathbf{y}_{t-\hat{N}}} = \mathbf{y}_{t-N} - \tilde{\mathbf{y}}_{t-\hat{N}} \quad (20)$$

$$\mathbf{e}_{\tilde{\mathbf{x}}_t} = \mathbf{K}_t(\mathbf{e}_{\mathbf{y}_{t-\hat{N}}}). \quad (21)$$

- 1241 6. Combine the initial plant state estimate and the correction term to create the current  
 1242 estimate of the plant state by

$$\hat{\mathbf{x}}_t = \tilde{\mathbf{x}}_{t|t-1} + \mathbf{e}_{\tilde{\mathbf{x}}_t}. \quad (22)$$

TABLE IV. State feedback control variables.

| Variable                                            | Description                                                                                                                                                                                             |
|-----------------------------------------------------|---------------------------------------------------------------------------------------------------------------------------------------------------------------------------------------------------------|
| $\mathbf{x}_t$                                      | True plant state at time $t$ .                                                                                                                                                                          |
| $\hat{\mathbf{x}}_t$                                | Estimate of the plant state at time $t$ using both the sensed plant output and the predicted plant state.                                                                                               |
| $\mathbf{e}_{\mathbf{y}_{t-N}}$                     | Error between the sensed plant output and the predicted plant output.                                                                                                                                   |
| $\mathbf{e}_{\hat{\mathbf{x}}_t}$                   | Error update applied to the predicted estimate of the plant state to create $\hat{\mathbf{x}}_t$                                                                                                        |
| $\tilde{\mathbf{y}}_{t-N}$                          | The predicted plant output, derived from estimates of the plant state, estimates of the feedback delay, and estimate of the plant transform from state to output.                                       |
| $\mathbf{K}_t(\mathbf{e}_{\mathbf{y}_{t-\hat{N}}})$ | Transformation (e.g. a Kalman gain) applied to the error between the predicted and sensed plant output. The transformation allows the actual plant output to influence the estimate of the plant state. |
| $\tilde{\mathbf{x}}_{(t-1)-\hat{N}}$                | Predicted estimate of the plant state using only the previous estimate of the plant state, the control signal, and the estimated plant dynamics.                                                        |
| $G_{dyn}, \hat{G}_{dyn}$                            | True and estimated plant dynamics.                                                                                                                                                                      |
| $G_{out}, \hat{G}_{out}$                            | True and estimated transformation from plant state to plant output.                                                                                                                                     |
| $\mathbf{y}_t$                                      | True plant output.                                                                                                                                                                                      |
| $\mathbf{u}_t$                                      | Control update to the plant.                                                                                                                                                                            |
| $\hat{\mathbf{x}}_{(t t-1)}$                        | Estimate of the plant state based on the control update to the plant, the estimate of the plant dynamics, and the previous estimate of the plant state.                                                 |
| $U_t(\mathbf{x}_t)$                                 | Controller that issues a control update based on the current estimated state of the plant. While a reference target is not shown in Houde (2011), presumably the reference is internal to $U_t$ .       |
| $N, \hat{N}$                                        | Actual delay and estimated delay between the plant output and the sensing of the plant output.                                                                                                          |

## 1243 Appendix B

1244 This appendix presents two articulatory speech synthesizers commonly referenced in the  
1245 literature: the Configurable Articulatory Synthesizer (CASYS), and the Maeda model. Bold  
1246 lower case letters represent vectors, and bold upper case letters represent matrices. A single

1247 overhead dot represents a time derivative, and a double dot represents a second order time  
1248 derivative.

#### 1249 4. Configurable Articulatory Synthesizer

1250 The Configurable Articulatory Synthesizer (CASYS) is a geometric model of the vocal tract  
1251 based on the work of Mermelstein (1973) and developed by Rubin *et al.* (1996) and Iskarous  
1252 *et al.* (2003). The governing equations are presented below, taken from Lammert (2013).  
1253 The “q” variables in Lammert *et al.* (2013), that represent the articulators in mobility space,  
1254 have been renamed to “u” in this paper for consistency of notation (see Tables V and VI  
1255 for details about the variables/constants).



$$x_{PRO} = u_{lx} \quad (23)$$

$$x_{LA} = l_{ut} \sin(a_{ut}) + l_{lt} \cos(u_{ja}) + u_{uy} - u_{ly} \quad (24)$$

$$a = u_{cl} \sin(u_{ja} + u_{ca}) \quad (25)$$

$$b = -u_{cl} \cos(u_{ja} + u_{ca}) \quad (26)$$

$$x_{TBCL} = a \cos \left( \frac{a - o_x}{\sqrt{(a - o_x)^2 + (b - o_y)^2}} \right) \quad (27)$$

$$x_{TBCLD} = r_{ts} - \left( \sqrt{(a - o_x)^2 + (b - o_y)^2} + r_{tb} \right) \quad (28)$$

$$c = u_{ja} + u_{ta} + s_{tb} (u_{cl} - l_{tb}) \quad (29)$$

$$d = a + r_{tb} \sin(u_{ja} + a_{tc}) + u_{tl} \sin(c) \quad (30)$$

$$e = b - r_{tb} \cos(u_{ja} + a_{tc}) - u_{tl} \cos(c) \quad (31)$$

$$x_{TTCL} = a \cos \left( \frac{d - o_x}{\sqrt{(d - o_x)^2 + (e - o_y)^2}} \right) \quad (32)$$

$$x_{TTCLD} = r_{tb} - \sqrt{(d - o_x)^2 + (e - o_y)^2} \quad (33)$$

## 1256 5. Maeda Articulatory Synthesizer

1257 The Maeda articulatory speech synthesizer is a variable cross-sectional area, tube model  
 1258 of the vocal tract. Resonances of the tube can be computed, and these resonances are the  
 1259 formants. The formants can then be used to shape a vocal source (voiced or unvoiced) to  
 1260 create speech. A MATLAB instantiation of the Maeda synthesizer was created by Ghosh  
 1261 and available for download ([Nieto-Castano, 2017](#)).

TABLE V. CASY variables.

| Variable | Description                       |
|----------|-----------------------------------|
| $x$      | Task space variable               |
| $u$      | Mobility space variable           |
| LX       | Lip protrusion                    |
| UY       | Upper lip vertical displacement   |
| UT       | Upper teeth                       |
| LY       | Lower lip vertical displacement   |
| JA       | Jaw angle                         |
| CA       | Tongue body angle                 |
| CL       | Tongue body length                |
| TL       | Tongue tip length                 |
| TA       | Tongue tip angle                  |
| LA       | Lip aperture                      |
| PRO      | Lip protrusion                    |
| TBCD     | Tongue body constriction degree   |
| TBCL     | Tongue body constriction location |
| TTCD     | Tongue tip constriction degree    |
| TTCL     | Tongue tip constriction location  |

1262 Ciccarelli (Ciccarelli, 2017) created a polynomial approximation to the vocal tract compo-  
1263 nent to allow fast formant computation and fast, tractable computation of the pseudoinverse  
1264 of the Jacobian. The polynomial approximation was determined by running the Ghosh im-  
1265 plementation of the Maeda model across a set of parameters, uniformly sampled from the  
1266 mobility space of the model, to create a lookup table of parameters and formant values.

TABLE VI. CASY constants.

| Constant | Value   |
|----------|---------|
| $l_{ut}$ | 1.1438  |
| $a_{ut}$ | -0.1888 |
| $l_{lt}$ | 1.1286  |
| $o_x$    | 0.7339  |
| $o_y$    | -0.4562 |
| $r_{ts}$ | 0.4     |
| $r_{tb}$ | 0.02    |
| $a_{tc}$ | 1.7279  |
| $l_{tb}$ | 0.8482  |
| $s_{tb}$ | 4.48    |

1267 Formant points outside the standard vowel quadrilateral as determined by visual inspection  
1268 were excluded. The remaining pairs of articulator points and formants were then fit using  
1269 a least squares polynomial approximation. The order of the polynomial was a compromise  
1270 between the fit to the data and the complexity of the polynomial. It was found that a sec-  
1271 ond order polynomial achieved a reasonable balance between these two requirements. While  
1272 the mapping from articulators to formants is preserved to within a certain error, it has not  
1273 been evaluated whether the relationship between articulators encoded by the polynomial  
1274 fundamental alters the trajectories of articulators in previous implementations of the Maeda  
1275 model.

1276 <sup>1</sup>In the speech motor control literature, the term ‘articulatory space’ is often used instead of ‘mobility space’.

1277 The latter term is adopted from the robotics literature ([Sciavicco et al., 2012](#)) here to provide a neutral

1278 terminology for referring specifically to the configuration of the plant, whereas terminology used in the

1279 literature often leads to confusion over whether the term ‘articulatory’ refers to low-level descriptions of

1280 the plant or high-level tasks spaces defined in articulatory terms.

1281 <sup>2</sup>For this example, the simplifying assumption is made that the feedback signal is in task space, i.e.  $\mathbf{y}_x$

1282 <sup>3</sup>optimal here means closest to the true state of the plant, where “closest” means having the smallest mean

1283 squared error

1284 <sup>4</sup>The description of SFC presented here uses a different notation than in [Houde and Nagarajan \(2011\)](#),

1285 simplified for clarity of presentation. For a more complete mathematical description, see Appendix A.

1286

1287 Åström, K. J., and Hägglund, T. (1995). *PID Controllers: Theory, Design, and Tuning*

1288 (ISA, Research Triangle Park, NC, USA).

1289 Åström, K. J., and Wittenmark, T. (2013). *Adaptive Control* (Courier Corporation).

1290 Baraduc, P., and Perrier, P. (2017). “Motor control of the tongue during speech: predictions

1291 of an optimization policy under sensorimotor noise,” *Neuroscience*, 403–408.

1292 Beamish, D., Bhatti, S. A., MacKenzie, I. S., and Wu, J. (2006). “Fifty years later: a

1293 neurodynamic explanation of Fitts’ law,” *Journal of The Royal Society Interface* **3**(10),

1294 649–654.

1295 Bellman, R. (1957). *Dynamic Programming* (Princeton University Press, Princeton, NJ,

1296 USA).

1297 Birkholz, P., Jackèl, D., and Kroger, B. J. (2006). “Construction and control of a three-

1298 dimensional vocal tract model,” in *Acoustics, Speech and Signal Processing, 2006. ICASSP*

- 1299 *2006 Proceedings. 2006 IEEE International Conference on*, IEEE, Vol. 1, pp. I–I.
- 1300 Black, A. W. (2002). “Perfect synthesis for all of the people all of the time,” in *Speech*  
1301 *Synthesis, 2002. Proceedings of 2002 IEEE Workshop on*, IEEE, pp. 167–170.
- 1302 Bohlund, J.W., and Guenther, F.H. (2006). “An fMRI investigation of syllable sequence  
1303 production,” *Neuroimage* **32**(2), 821–841.
- 1304 Bohland, J. W., Bullock, D., and Guenther, F. H. (2010). “Neural representations and mech-  
1305 anisms for the performance of simple speech sequences,” *Journal of Cognitive Neuroscience*  
1306 **22**(7), 1504–1529.
- 1307 Boonstra, T. A., Schouten, A. C., and Van der Kooij, H. (2013). “Identification of the  
1308 contribution of the ankle and hip joints to multi-segmental balance control,” *Journal of*  
1309 *Neuroengineering and Rehabilitation* **10**(1), 23.
- 1310 Brainard, M. S., and Doupe, A. J. (2002). “What songbirds teach us about learning,”  
1311 *Nature* **417**(6886), 351.
- 1312 Browman, C. P., and Goldstein, L. M. (1986). “Towards an articulatory phonology,” *Phonol-*  
1313 *ogy* **3**(01), 219–252.
- 1314 Browman, C.P., and Goldstein, L.M. (1992). “Articulatory phonology: An overview,” *Pho-*  
1315 *netica* **49**(3–4), 155–180.
- 1316 Browman, C.P., and Goldstein, L. (1995). “Dynamics and articulatory phonology,” *Mind as*  
1317 *Motion: Dynamics, Behavior, and Cognition*, edited by R. Port and T. van Gelder (MIT  
1318 Press, Boston, MA, USA).
- 1319 Browman, C.P., and Goldstein, L. (1995). “Gestural syllable position effects in American  
1320 English,” *Studies in Speech Production: a festschrift for Katherine Safford Harris*, edited

- 1321 by F. Bell-Berti and L.J. Raphael (American Institute of Physics, Woodbury, NY, USA).
- 1322 Buchaillard, S., Perrier, P., and Payan, Y. (2009). “A biomechanical model of cardinal  
1323 vowel production: Muscle activations and the impact of gravity on tongue positioning,”  
1324 The Journal of the Acoustical Society of America **126**(4), 2033–2051.
- 1325 Bullock, D., and Grossberg, S. (1988). “Neural dynamics of planned arm movements: emer-  
1326 gent invariants and speed-accuracy properties during trajectory formation,” Psychological  
1327 Review **95**(1), 49–90.
- 1328 Byrd, D., and Saltzman, E. (2003). “The elastic phrase: modeling the dynamics of  
1329 boundary-adjacent lengthening,” Journal of Phonetics **31**(2), 149–180.
- 1330 Byrd, D., Tobin, S., Bresch, E., and Narayanan, S. (2009). “Timing effects of syllable  
1331 structure and stress on nasals: a real-time MRI examination,” Journal of Phonetics **37**(1),  
1332 97–110.
- 1333 Ciccarelli, G. A. (2017). “Characterization of phone rate as a vocal biomarker of depression,”  
1334 Ph.D. thesis, Massachusetts Institute of Technology.
- 1335 Ciccarelli, G. A., Quatieri, T. F., and Ghosh, S. S. (2016). “Neurophysiological vocal source  
1336 modeling for biomarkers of disease,”.
- 1337 Civier, O., Bullock, D., Max, L., and Guenther, F. H. (2013). “Computational modeling  
1338 of stuttering caused by impairments in a basal ganglia thalamo-cortical circuit involved in  
1339 syllable selection and initiation,” Brain and Language **126**(3), 263–278.
- 1340 Dang, J., and Honda, K. (2002). “Estimation of vocal tract shapes from speech sounds with  
1341 a physiological articulatory model,” Journal of Phonetics **30**(3), 511–532.

- 1342 Dang, J., and Honda, K. (2004). “Construction and control of a physiological articulatory  
1343 model,” *Journal of the Acoustical Society of America* **115**(2), 853–70.
- 1344 Derrick, D., Stavness, I., and Gick, B. (2015). “Three speech sounds, one motor action:  
1345 evidence for speech-motor disparity from english flap production,” *The Journal of the*  
1346 *Acoustical Society of America* **137**(3), 1493–1502.
- 1347 Diedrichsen, J., Shadmehr, R., and Ivry, R. B. (2010). “The coordination of movement:  
1348 optimal feedback control and beyond,” *Trends in Cognitive Sciences* **14**(1), 31–39.
- 1349 Engelhart, D., Boonstra, T. A., Aarts, R. G., Schouten, A. C., and van der Kooij, H. (2016).  
1350 “Comparison of closed-loop system identification techniques to quantify multi-joint human  
1351 balance control,” *Annual Reviews in Control* **41**, 58–70.
- 1352 Engelhart, D., Pasma, J. H., Schouten, A. C., Aarts, R. G., Meskers, C. G., Maier, A. B., and  
1353 van der Kooij, H. (2015). “Adaptation of multijoint coordination during standing balance  
1354 in healthy young and healthy old individuals,” *Journal of Neurophysiology* **115**(3), 1422–  
1355 1435.
- 1356 Feldman, A. G. (1986). “Once more on the equilibrium-point hypothesis ( $\lambda$  model) for  
1357 motor control,” *Journal of Motor Behavior* **18**(1), 17–54.
- 1358 Feldman, A., Adamovich, S., Ostry, D., and Flanagan, J. (1990). “The origin of electromyo-  
1359 grams – explanations based on the equilibrium point hypothesis,” in *Multiple Muscle Sys-*  
1360 *tems* (Springer), pp. 195–213.
- 1361 Flash, T., and Hogan, N. (1985). “The coordination of arm movements: an experimentally  
1362 confirmed mathematical model,” *Journal of Neuroscience* **5**(7), 1688–1703.

- 1363 Fougeron, C., and Keating, P.A. (1997). “Articulatory strengthening at edges of prosodic  
1364 domains,” *Journal of the Acoustical Society of America* **101**(6), 3728–3740.
- 1365 Fowler, C., and Saltzman, E. (1993). “Coordination and coarticulation in speech produc-  
1366 tion,” *Language and Speech* **36**, 171-195.
- 1367 Garcia, C. E., Prett, D. M., and Morari, M. (1989). “Model predictive control: theory and  
1368 practice: a survey,” *Automatica* **25**(3), 335–348.
- 1369 Ghosh, S. S. (2005). “Understanding cortical and cerebellar contributions to speech pro-  
1370 duction through modeling and functional imaging,” Ph.D. thesis, Boston University.
- 1371 Ghosh, S.S., Tourville, J.A., and Guenther, F.H. (2008). “A neuroimaging study of premotor  
1372 lateralization and cerebellar involvement in the production of phonemes and syllables,”  
1373 *Journal of Speech, Language, and Hearing Research* **51**(5), 1183–1202.
- 1374 Gick, B., Stavness, I., Chiu, C., and Fels, S. (2011). “Categorical variation in lip posture is  
1375 determined by quantal biomechanical-articulatory relations,” *Canadian Acoustics* **39**(3),  
1376 178–179.
- 1377 Golfinopoulos, E., Tourville, J. A., Bohland, J. W., Ghosh, S. S., Nieto-Castanon, A.,  
1378 and Guenther, F. H. (2011). “fMRI investigation of unexpected somatosensory feedback  
1379 perturbation during speech,” *Neuroimage* **55**(3), 1324–1338.
- 1380 Guenther, F. H. (1994). “A neural network model of speech acquisition and motor equivalent  
1381 speech production,” *Biological Cybernetics* **72**(1), 43–53.
- 1382 Guenther, F.H. (1995). “Speech Sound Acquisition, Coarticulation, and Rate Effects in a  
1383 Neural Network Model of Speech Production,” *Psychological Review* **102**, 594-621.
- 1384 Guenther, F. H. (2016). *Neural Control of Speech* (MIT Press).



- 1385 Guenther, F. H., Ghosh, S. S., and Tourville, J. A. (2006). “Neural modeling and imaging  
1386 of the cortical interactions underlying syllable production,” *Brain and Language* **96**(3),  
1387 280–301.
- 1388 Guenther, F. H., Hampson, M., and Johnson, D. (1998). “A theoretical investigation of  
1389 reference frames for the planning of speech movements,” *Psychological Review* **105**(4),  
1390 611.
- 1391 Hickok, G. (2012a). “Computational neuroanatomy of speech production,” *Nature Reviews*  
1392 *Neuroscience* **13**(2), 135–145.
- 1393 Hickok, G. (2012b). “The cortical organization of speech processing: Feedback control and  
1394 predictive coding the context of a dual-stream model,” *Journal of Communication Disor-*  
1395 *ders* **45**(6), 393–402.
- 1396 Hickok, G. (2014). “The architecture of speech production and the role of the phoneme in  
1397 speech processing,” *Language, Cognition and Neuroscience* **29**(1), 2–20.
- 1398 Hogan, N. (1984). “An organizing principle for a class of voluntary movements,” *Journal of*  
1399 *Neuroscience* **4**(11), 2745–2754.
- 1400 Houde, J. F., and Chang, E. F. (2015). “The cortical computations underlying feedback  
1401 control in vocal production,” *Current Opinion in Neurobiology* **33**, 174–181.
- 1402 Houde, J. F., and Nagarajan, S. S. (2011). “Speech production as state feedback control,”  
1403 *Frontiers in Human Neuroscience* **5**, 82.
- 1404 Houde, J. F., Niziolek, C., Kort, N., Agnew, Z., and Nagarajan, S. S. (2014). “Simulating a  
1405 state feedback model of speaking,” In *10th International Seminar on Speech Production*,  
1406 202–205.

- 1407 Iskarous, K., Goldstein, L., Whalen, D. H., Tiede, M., and Rubin, P. (2003). “Casy: The  
1408 Haskins Configurable Articulatory Synthesizer,” in *International Congress of Phonetic  
1409 Sciences, Barcelona, Spain*, pp. 185–188.
- 1410 Kalman, R. E. *et al.* (1960). “A new approach to linear filtering and prediction problems,”  
1411 *Journal of Basic Engineering* **82**(1), 35–45.
- 1412 Kröger, B. J., and Birkholz, P. (2007). “A gesture-based concept for speech movement con-  
1413 trol in articulatory speech synthesis,” in *Verbal and Nonverbal Communication Behaviours  
1414 (Springer)*, pp. 174–189.
- 1415 Kröger, B. J., Kannampuzha, J., and Neuschaefer-Rube, C. (2009). “Towards a neurocom-  
1416 putational model of speech production and perception,” *Speech Communication* **51**(9),  
1417 793–809.
- 1418 Laboissiere, R., Ostry, D.J., and Feldman, A.G. (1996). “The control of multi-muscle sys-  
1419 tems: human jaw and hyoid movements,” *Biological Cybernetics* **74**(4), 373–384.
- 1420 Lammert, A. C., Ramanarayanan, V., Proctor, M. I., Narayanan, S. *et al.* (2013). “Vocal  
1421 tract cross-distance estimation from real-time MRI using region-of-interest analysis,” in  
1422 *Interspeech*, pp. 959–962.
- 1423 Lammert, A.C., Shadle, C.H., Narayanan, S.S., and Quatieri, T.F. (2018). “Speed-accuracy  
1424 tradeoffs in human speech production,” *PloS one* **13**(9), e0202180.
- 1425 Lisberger, S. (1988). “The neural basis for motor learning in the vestibulo-ocular reflex in  
1426 monkeys,” *Trends in Neurosciences* **11**(4), 147–152.
- 1427 Lloyd, J. E., Stavness, I., and Fels, S. (2012). “Artisynth: A fast interactive biomechanical  
1428 modeling toolkit combining multibody and finite element simulation,” in *Soft Tissue*

- 1429 *Biomechanical Modeling for Computer Assisted Surgery* (Springer), pp. 355–394.
- 1430 Maeda, S. (1982). “A digital simulation method of the vocal-tract system,” *Speech Com-*  
1431 *munication* **1**(3-4), 199–229.
- 1432 Mermelstein, P. (1973). “Articulatory model for the study of speech production,” *Journal*  
1433 *of the Acoustical Society of America* **53**(4), 1070–1082.
- 1434 Miall, R. C., and Wolpert, D. M. (1996). “Forward models for physiological motor control,”  
1435 *Neural Networks* **9**(8), 1265–1279.
- 1436 Mitra, V., Nam, H., Espy-Wilson, C. Y., Saltzman, E., and Goldstein, L. (2010). “Retrieving  
1437 tract variables from acoustics: a comparison of different machine learning strategies,” *IEEE*  
1438 *Journal of Selected Topics in Signal Processing* **4**(6), 1027–1045.
- 1439 Munhall, K. G., Löfqvist, A., and Kelso, J. S. (1994). “Lip–larynx coordination in speech:  
1440 Effects of mechanical perturbations to the lower lip,” *Journal of the Acoustical Society of*  
1441 *America* **95**(6), 3605–3616.
- 1442 Nam, H. (2012). “TADA: TAsk Dynamic Application” [http://www.haskins.yale.edu/](http://www.haskins.yale.edu/tada_download/index.php)  
1443 [tada\\_download/index.php](http://www.haskins.yale.edu/tada_download/index.php).
- 1444 Nam, H., Goldstein, L., Browman, C., Rubin, P., Proctor, M., and Saltzman, E. (2006).  
1445 *TADA (TAsk Dynamics Application) Manual*.
- 1446 Nazari, M. A., Perrier, P., Chabanas, M., and Payan, Y. (2011). “Shaping by stiffening: a  
1447 modeling study for lips,” *Motor Control* **15**(1), 141–168.
- 1448 Nieto-Castanon, A., Guenther, F.H., Perkell, J.S., and Curtin, H.D. (2005). “A model-  
1449 ing investigation of articulatory variability and acoustic stability during American En-  
1450 glish/r/production,” *Journal of the Acoustical Society of America* **117**(5), 3196–3212.

- 1451 Nieto-Castano, A. (2017). “VTCalcs for Matlab” [\\$http://sites.bu.edu/guentherlab/](http://sites.bu.edu/guentherlab/software/vtcalcs-for-matlab/)  
1452 [software/vtcalcs-for-matlab/](http://sites.bu.edu/guentherlab/software/vtcalcs-for-matlab/).
- 1453 Nieto-Castanon, A. (2016). “DIVA Source Code” [\\$http://sites.bu.edu/guentherlab/](http://sites.bu.edu/guentherlab/software/diva-source-code/)  
1454 [software/diva-source-code/](http://sites.bu.edu/guentherlab/software/diva-source-code/).
- 1455 Niziolek, C.A., and Guenther, F.H. (2013). “Vowel category boundaries enhance cortical  
1456 and behavioral responses to speech feedback alterations,” *Journal of Neuroscience* **33**(29),  
1457 12090–12098.
- 1458 Ostry, D. J., Gribble, P. L., and Gracco, V. L. (1996). “Coarticulation of jaw movements in  
1459 speech production: is context sensitivity in speech kinematics centrally planned?,” *Journal*  
1460 *of Neuroscience* **16**(4), 1570–1579.
- 1461 Parrell, B., Ramanarayanan, V., Nagarajan, S., and Houde, J. (2018). “FACTS: A hierarchi-  
1462 cal task-based control model of speech incorporating sensory feedback,” *Proc. Interspeech*  
1463 2018, 1497–1501.
- 1464 Patri, J.-F., Diard, J., and Perrier, P. (2015). “Optimal speech motor control and token-to-  
1465 token variability: a bayesian modeling approach,” *Biological Cybernetics* **109**(6), 611–626.
- 1466 Patri, J.F. (2018). “Bayesian modeling of speech motor planning: variability, multisensory  
1467 goals and perceptuo-motor interactions,” Ph.D. thesis, Université Grenoble-Alpes.
- 1468 Payan, Y., and Perrier, P. (1997). “Synthesis of VV sequences with a 2D biomechanical  
1469 tongue model controlled by the Equilibrium Point Hypothesis,” *Speech Communication*  
1470 **22**(2-3), 185–205.
- 1471 Perrier, P., Ostry, D., and Laboissière, R. (1996). “The equilibrium point hypothesis and its  
1472 application to speech motor control,” *Journal of Speech and Hearing Research* **39**, 365–78.

- 1473 Perrier, P., Payan, Y., Zandipour, M., and Perkell, J (2003). “Influences of tongue biome-  
1474 chanics on speech movements during the production of velar stop consonants: A modeling  
1475 study,” *Journal of the Acoustical Society of America* **114**(3), 1582–1599.
- 1476 Perrier, P., Ma, L., and Payan, Y. (2005). “Modeling the production of VCV sequences via  
1477 the inversion of a biomechanical model of the tongue,”
- 1478 Perrier, P., and Fuchs, S. (2008). “Speed–curvature relations in speech production challenge  
1479 the 1/3 power law,” *Journal of Neurophysiology* **100**(3), 1171–1183.
- 1480 Ramanarayanan, V., Goldstein, L., and Narayanan, S. S. (2014). “Motor control primitives  
1481 arising from a learned dynamical systems model of speech articulation,” in *Fifteenth Annual  
1482 Conference of the International Speech Communication Association*.
- 1483 Ramanarayanan, V., Parrell, B., Goldstein, L., Nagarajan, S., and Houde, J. (2016). “A new  
1484 model of speech motor control based on task dynamics and state feedback,” *Interspeech  
1485 2016* 3564–3568.
- 1486 Robinson, D. A. (1981). “Models of the mechanics of eye movements,” *Models of Oculomo-  
1487 tor Behavior and Control* 21–41.
- 1488 Rubin, P., Baer, T., and Mermelstein, P. (1981). “An articulatory synthesizer for perceptual  
1489 research,” *Journal of the Acoustical Society of America* **70**(2), 321–328.
- 1490 Rubin, P., Saltzman, E., Goldstein, L., McGowan, R., Tiede, M., and Browman, C. (1996).  
1491 “Casy and extensions to the task-dynamic model,” in *Speech Production Seminar*, pp.  
1492 125–128.
- 1493 Saltzman, E. (1986). “Task dynamic coordination of the speech articulators: a preliminary  
1494 model,” US Department of Commerce Report.

- 1495 Saltzman, E., and Kelso, J. (1987). “Skilled actions: a task-dynamic approach,” *Psycho-*  
1496 *logical Review* **94**(1), 84.
- 1497 Saltzman, E., Löfqvist, A., Kinsella-Shaw, J., Kay, B., and Rubin, P. (1995). “On the  
1498 dynamics of temporal patterning in speech,” *Studies in speech production: A Festschrift*  
1499 *for Katherine Safford Harris*. Woodbury, New York: American Institute of Physics 469–487.
- 1500 Saltzman, E., and Munhall, K. (1989). “A dynamical approach to gestural patterning in  
1501 speech production,” *Ecological psychology* **1**(4), 333–382.
- 1502 Saltzman, E., Nam, H., Krivokapic, J., and Goldstein, L. (2008). “A task-dynamic toolkit  
1503 for modeling the effects of prosodic structure on articulation,” in *Proceedings of the 4th*  
1504 *international conference on speech prosody. Brazil: Campinas*, pp. 175–184.
- 1505 Sanguineti, V., Laboissière, R., and Ostry, D. (1990). “A dynamic biomechanical model for  
1506 neural control of speech production,” *Journal of the Acoustical Society of America* **103**(3),  
1507 1615–27.
- 1508 Sanguineti, V., Laboissière, R., and Ostry, D. J. (1998). “A dynamic biomechanical model  
1509 for neural control of speech production,” *Journal of the Acoustical Society of America*  
1510 **103**(3), 1615–1627.
- 1511 Schaal, S., and Schweighofer, N. (2005). “Computational motor control in humans and  
1512 robots,” *Current Opinion in Neurobiology* **15**(6), 675–682.
- 1513 Schroeter, J. (2006). “Text to speech synthesis. new paradigms and advances [book review],”  
1514 *IEEE Signal Processing Magazine* **23**(6), 72–73.
- 1515 Sciavicco, L., and Siciliano, B. (2012). “Modelling and Control of Robot Manipulators,”  
1516 (Springer Science & Business Media).

- 1517 Scott, S. H. (2004). “Optimal feedback control and the neural basis of volitional motor  
1518 control,” *Nature Reviews Neuroscience* **5**(7), 532.
- 1519 Shadle, C. H., and Damper, R. I. (2002). “Prospects for articulatory synthesis: A position  
1520 paper,” .
- 1521 Shadmehr, R., and Krakauer, J. W. (2008). “A computational neuroanatomy for motor  
1522 control,” *Experimental Brain Research* **185**(3), 359–381.
- 1523 Shibata, T., and Schaal, S. (2001). “Biomimetic gaze stabilization based on feedback-error-  
1524 learning with nonparametric regression networks,” *Neural Networks* **14**(2), 201–216.
- 1525 Shiller, D. M., Laboissière, R., and Ostry, D. J. (2002). “Relationship between jaw stiffness  
1526 and kinematic variability in speech,” *Journal of Neurophysiology* **88**(5), 2329–2340.
- 1527 Smith, O. J. (1959). “A controller to overcome dead time,” *ISA Journal* **6**(2), 28–33.
- 1528 Takakusaki, K. (2017). “Functional neuroanatomy for posture and gait control,” *Journal of*  
1529 *Movement Disorders* **10**(1), 1.
- 1530 Tian, X., and Poeppel, D. (2010). “Mental imagery of speech and movement implicates the  
1531 dynamics of internal forward models,” *Frontiers in Psychology* **1**.
- 1532 Tilsen, S. (2016). “Selection and coordination: The articulatory basis for the emergence of  
1533 phonological structure,” *Journal of Phonetics* **55**, 53–77.
- 1534 Tilsen, S. (2017). “Exertive modulation of speech and articulatory phasing,” *Journal of*  
1535 *Phonetics* .
- 1536 Todorov, E. (2004). “Optimality principles in sensorimotor control,” *Nature Neuroscience*  
1537 **7**(9), 907.

- 1538 Todorov, E., and Jordan, M. I. (1998). “Smoothness maximization along a predefined path  
1539 accurately predicts the speed profiles of complex arm movements,” *Journal of Neurophys-*  
1540 *iology* **80**(2), 696–714.
- 1541 Todorov, E., and Jordan, M. I. (2002). “Optimal feedback control as a theory of motor  
1542 coordination,” *Nature Neuroscience* **5**(11), 1226.
- 1543 Tourville, J.A., Reilly, K.J., and Guenther, F.H. (2008). “Neural mechanisms underlying  
1544 auditory feedback control of speech,” *Neuroimag* **39**(3), 1429–1443.
- 1545 Tourville, J. A., and Guenther, F. H. (2011). “The DIVA model: a neural theory of speech  
1546 acquisition and production,” *Language and Cognitive Processes* **26**(7), 952–981.
- 1547 Villacorta, V.M., Perkell, J.S., and Guenther, F.H. (2007). “Sensorimotor adaptation to  
1548 feedback perturbations of vowel acoustics and its relation to perception,” *Journal of the*  
1549 *Acoustical Society of America* **122**(4), 2306–2319.
- 1550 Wan, E. A., and Van Der Merwe, R. (2001). “The unscented kalman filter,” in *Kalman*  
1551 *Filtering and Neural Networks*, edited by S. Haykin (Wiley, New York).
- 1552 Wiener, N. (1948). *Cybernetics: Control and communication in the animal and the machine*  
1553 (Wiley New York).
- 1554 Wolpert, D. M., Miall, R. C., and Kawato, M. (1998). “Internal models in the cerebellum,”  
1555 *Trends in Cognitive Sciences* **2**(9), 338–347.
- 1556 Zandipour, M., Guenther, F., Perkell, J., Perrier, P., Payan, Y., and Badin, P. (2004).  
1557 “Vowel-vowel planning in acoustic and muscle space,” *Proceedings of “From Sound to*  
1558 *Sense: 50+ years of discoveries in speech communication”*, C103–C108.



1559 Zsiga, E. (1994). “An Acoustic and Electropalatographic Study of Lexical and Post-lexical  
1560 Palatalization in American English,” Haskins Laboratories Status Report on Speech Re-  
1561 search **SR-117/118**, 67–79.
